# Supplementary material for: Aggregated Genomic Data as Cohort-Specific Allelic Frequencies can Boost Variants and Genes Prioritization in Non-Solved Cases of Inherited Retinal Dystrophies
Source: MDPI journal article supplement (doi:10.3390/ijms23158431), 2022-07-29
Supplement: s1 [file s1]

**Supplementary Material:** Supplementary Tables S1-12; Supplementary Figures S1-6.

**Aggregated genomic data as cohort-specific allelic frequencies can boost variants and genes prioritization in non-solved cases of inherited retinal dystrophies**

Ionut-Florin Iancu<sup>1,2</sup>, Irene Perea-Romero<sup>1,2</sup>, Gonzalo Núñez-Moreno<sup>1,2,3</sup>, Lorena de la Fuente<sup>1,3</sup>, Raquel Romero<sup>1,2</sup>, Almudena Ávila-Fernandez<sup>1,2</sup>, María José Trujillo-Tiebas<sup>1,2</sup>, Rosa Riveiro-Álvarez<sup>1,2</sup>, Berta Almoguera<sup>1,2</sup>, Inmaculada Martín-Mérida<sup>1,2</sup>, Marta Del Pozo-Valero<sup>1,2</sup>, Alejandra Damián-Verde<sup>1</sup>, Marta Cortón<sup>1,2</sup>, Carmen Ayuso<sup>1,2</sup># and Pablo Minguez<sup>1,2,3</sup>#

<sup>1</sup>Department of Genetics, Health Research Institute–Fundación Jiménez Díaz University Hospital, Universidad Autónoma de Madrid (IIS-FJD, UAM), Madrid, Spain.

<sup>2</sup>Center for Biomedical Network Research on Rare Diseases (CIBERER), ISCIII, Madrid, Spain.

<sup>3</sup>Bioinformatics Unit, Health Research Institute–Fundación Jiménez Díaz University Hospital, Universidad Autónoma de Madrid (IIS-FJD, UAM), Madrid, Spain.

# Corresponding authors: [cayuso@fjd.es](mailto:cayuso@fjd.es) and [pablo.minguez@quironsalud.es](mailto:pablo.minguez@quironsalud.es)

**Supplementary Tables**

**Table S1.** Number of deleterious and benign within the prioritized (IRD-MFV) and non-prioritized sets in IRD solved cases, including those in all genes and in genes from the inherited retinal dystrophies (IRD) panel, the other eye related diseases (OERD) and non-eye related diseases (NRD). P-values of the Fishers' exact test are shown.

|        | GENE_PANEL | Clinical Significance | IRD-MFV | Non-prioritized | p-value  |
|--------|------------|-----------------------|---------|-----------------|----------|
| SOLVED | ALL genes  | Deleterious           | 404     | 4191            | 4.77E-56 |
|        |            | Benign                | 762     | 23020           |          |
|        | IRD genes  | Deleterious           | 177     | 593             | 5.97E-61 |
|        |            | Benign                | 49      | 1926            |          |
|        | OERD genes | Deleterious           | 80      | 1457            | 1.71E-06 |
|        |            | Benign                | 314     | 10843           |          |
|        | NRD genes  | Deleterious           | 147     | 2141            | 2.75E-08 |
|        |            | Benign                | 399     | 10251           |          |

**Table S2.** Number of deleterious and benign within the prioritized (IRD-MFV) and non-prioritized sets in IRD non-solved cases, including those in all genes and in genes from the inherited retinal dystrophies (IRD) panel, the other eye related diseases (OERD) and non-eye related diseases (NRD). P—values of the Fishers' exact test are shown.

|            | GENE_PANEL | Clinical Significance | IRD-MFV | Non-prioritized | p-value  |
|------------|------------|-----------------------|---------|-----------------|----------|
| NON-SOLVED | ALL genes  | Deleterious           | 148     | 2143            | 1.69E-32 |
|            |            | Benign                | 399     | 21222           |          |
|            | IRD genes  | Deleterious           | 7       | 193             | 6.6E-02  |
|            |            | Benign                | 31      | 1844            |          |
|            | OERD genes | Deleterious           | 37      | 770             | 3.25E-06 |
|            |            | Benign                | 186     | 9805            |          |
|            | NRD genes  | Deleterious           | 104     | 1180            | 1.90E-28 |
|            |            | Benign                | 182     | 9573            |          |

**Table S3.** Number of deleterious and benign within the prioritized (IRD-MFV) and non-prioritized sets in IRD solved syndromic (SY), IRD non-syndromic (NSY) and macular dystrophies (MD) cases, including those in all genes and in genes from the inherited retinal dystrophies (IRD) panel, the other eye related diseases (OERD) and non-eye related diseases (NRD). P-values of the Fishers' exact test are shown.

|        | GENE_PANEL | IRD type | Clinical Significance | IRD-MFV | Non-prioritized | p-value  |
|--------|------------|----------|-----------------------|---------|-----------------|----------|
| SOLVED | IRD genes  | SY       | Benign                | 11      | 427             | 7.84E-06 |
|        |            |          | Deleterious           | 13      | 68              |          |
|        |            | NSY      | Benign                | 23      | 585             | 8.09E-26 |
|        |            |          | Deleterious           | 86      | 214             |          |
|        |            | MD       | Benign                | 18      | 1099            | 2.19E-25 |
|        |            |          | Deleterious           | 56      | 239             |          |
|        | OERD genes | SY       | Benign                | 52      | 4184            | 2.29E-08 |
|        |            |          | Deleterious           | 19      | 257             |          |
|        |            | NSY      | Benign                | 207     | 7094            | 2.28E-06 |
|        |            |          | Deleterious           | 52      | 801             |          |
|        |            | MD       | Benign                | 153     | 6076            | 1.35E-04 |
|        |            |          | Deleterious           | 34      | 618             |          |
|        | NRD genes  | SY       | Benign                | 68      | 4126            | 1.89E-12 |
|        |            |          | Deleterious           | 36      | 414             |          |
|        |            | NSY      | Benign                | 228     | 6795            | 1.67E-13 |
|        |            |          | Deleterious           | 103     | 1176            |          |
|        |            | MD       | Benign                | 200     | 5897            | 3.02E-03 |
|        |            |          | Deleterious           | 48      | 871             |          |

**Table S4.** Number of deleterious and benign within the prioritized (IRD-MFV) and non-prioritized sets in IRD non-solved syndromic (SY), non-syndromic (NSY) and macular dystrophies (MD) cases, including those in all genes and in genes from the inherited retinal dystrophies (IRD) panel, the other eye related diseases (OERD) and non-eye related diseases (NRD). P-values of the Fishers' exact test are shown.

|            | GENE_PANEL | IRD type | Clinical Significance | IRD-MFV | Non-prioritized | p-value  |
|------------|------------|----------|-----------------------|---------|-----------------|----------|
| NON-SOLVED | IRD genes  | SY       | Benign                | 7       | 355             | 1.39E-06 |
|            |            |          | Deleterious           | 7       | 14              |          |
|            |            | NSY      | Benign                | 16      | 494             | 3.71E-04 |
|            |            |          | Deleterious           | 8       | 39              |          |
|            |            | MD       | Benign                | 29      | 935             | 1.03E-01 |
|            |            |          | Deleterious           | 5       | 73              |          |
|            | OERD genes | SY       | Benign                | 57      | 3297            | 9.57E-18 |
|            |            |          | Deleterious           | 25      | 100             |          |
|            |            | NSY      | Benign                | 145     | 5742            | 1.42E-06 |
|            |            |          | Deleterious           | 31      | 415             |          |
|            |            | MD       | Benign                | 118     | 5176            | 7.03E-10 |
|            |            |          | Deleterious           | 31      | 311             |          |
|            | NRD genes  | SY       | Benign                | 29      | 3350            | 2.69E-26 |
|            |            |          | Deleterious           | 35      | 194             |          |
|            |            | NSY      | Benign                | 129     | 6795            | 7.84E-23 |
|            |            |          | Deleterious           | 76      | 1176            |          |
|            |            | MD       | Benign                | 105     | 5186            | 4.57E-18 |
|            |            |          | Deleterious           | 54      | 499             |          |

**Table S5.** Genes that ACMG recommends to report secondary findings. These genes are filtered out from the OERD and NRD gene panels.

| Gene    |        |        |         |
|---------|--------|--------|---------|
| ACTA2   | HFE    | PCSK9  | TGFBR2  |
| ACTC1   | HNF1A  | PKP2   | TMEM127 |
| ACVRL1  | KCNH2  | PMS2   | TMEM43  |
| APC     | KCNQ1  | PRKAG2 | TNNI3   |
| APOB    | LDLR   | PTEN   | TNNT2   |
| ATP7B   | LMNA   | RB1    | TP53    |
| BMPR1A  | MAX    | RET    | TPM1    |
| BRCA1   | MEN1   | RPE65  | TRDN    |
| BRCA2   | MLH1   | RYR1   | TSC1    |
| BTD     | MSH2   | RYR2   | TSC2    |
| CACNA1S | MSH6   | SCN5A  | TTN     |
| CASQ2   | MUTYH  | SDHAF2 | VHL     |
| COL3A1  | MYBPC3 | SDHB   | WT1     |
| DSC2    | MYH11  | SDHC   |         |
| DSP     | MYH7   | SDHD   |         |
| ENG     | MYL2   | SMAD3  |         |
| FBN1    | MYL3   | SMAD4  |         |
| FLNC    | NF2    | STK11  |         |
| GAA     | OTC    | TGFBR1 |         |
| GLA     | PALB2  | TGFBR2 |         |

**Table S6.** Genes prioritized in solved cases of inherited retinal dystrophies. They are classified in three gene panels: genes from the inherited retinal dystrophies (IRD) panel, other eye related diseases (OERD) and non-eye related diseases (NRD).

| Gene    | Deleterious | Benign | FDR      | Gene Panel |
|---------|-------------|--------|----------|------------|
| ABCA4   | 84          | 24     | 1.13E-08 | IRD        |
| USH2A   | 73          | 76     | 7.35E-11 | IRD        |
| MYO7A   | 31          | 41     | 3.94E-06 | IRD        |
| EYS     | 20          | 11     | 3.20E-03 | IRD        |
| ADGRV1  | 14          | 67     | 6.73E-04 | IRD        |
| CRB1    | 13          | 7      | 4.81E-02 | IRD        |
| PROM1   | 13          | 7      | 1.59E-02 | IRD        |
| CNGB3   | 13          | 8      | 5.10E-03 | IRD        |
| VPS13B  | 13          | 37     | 1.59E-02 | IRD        |
| CEP290  | 12          | 23     | 5.67E-04 | IRD        |
| RPGR    | 10          | 7      | 1.62E-02 | IRD        |
| CDH23   | 9           | 35     | 1.77E-03 | IRD        |
| DYNC2H1 | 9           | 39     | 7.28E-04 | IRD        |
| TRPM1   | 9           | 14     | 1.92E-02 | IRD        |

|         |    |    |          |      |
|---------|----|----|----------|------|
| AHI1    | 9  | 29 | 2.41E-03 | IRD  |
| OPA1    | 8  | 19 | 2.74E-03 | IRD  |
| HMCN1   | 7  | 45 | 1.26E-02 | IRD  |
| COL11A1 | 6  | 36 | 1.47E-02 | IRD  |
| PRPF31  | 6  | 5  | 2.07E-02 | IRD  |
| BBS9    | 6  | 9  | 1.52E-02 | IRD  |
| RPE65   | 5  | 5  | 2.89E-02 | IRD  |
| GRM6    | 5  | 14 | 2.24E-02 | IRD  |
| NEB     | 22 | 84 | 1.23E-05 | OERD |
| PAH     | 18 | 8  | 1.38E-02 | OERD |
| DNAH11  | 14 | 36 | 1.70E-04 | OERD |
| DNAH5   | 13 | 47 | 1.22E-02 | OERD |
| ATM     | 12 | 60 | 1.22E-02 | OERD |
| HSPG2   | 11 | 53 | 9.11E-04 | OERD |
| LAMA2   | 9  | 49 | 1.75E-03 | OERD |
| PLEC    | 9  | 87 | 1.62E-02 | OERD |
| MPDZ    | 9  | 28 | 6.33E-03 | OERD |
| ABCC8   | 8  | 9  | 1.26E-02 | OERD |
| COL5A2  | 8  | 36 | 4.81E-02 | OERD |
| COL7A1  | 8  | 26 | 3.67E-02 | OERD |
| C1QTNF5 | 7  | 8  | 1.59E-02 | OERD |
| DNAH9   | 7  | 6  | 1.44E-02 | OERD |
| FLNB    | 7  | 37 | 1.78E-02 | OERD |
| DOCK8   | 7  | 28 | 1.62E-02 | OERD |
| CENPJ   | 6  | 8  | 2.89E-02 | OERD |
| FANCI   | 6  | 24 | 3.19E-02 | OERD |
| GALK1   | 6  | 9  | 1.28E-02 | OERD |
| XYLT1   | 5  | 11 | 1.42E-02 | OERD |
| ABCA12  | 5  | 15 | 4.04E-02 | OERD |
| COL4A3  | 5  | 15 | 2.31E-02 | OERD |
| MME     | 5  | 5  | 4.57E-02 | OERD |
| EFHC1   | 5  | 14 | 1.52E-02 | OERD |
| OBSCN   | 16 | 95 | 1.62E-02 | NRD  |
| DYSF    | 9  | 43 | 2.74E-03 | NRD  |
| SPTBN5  | 8  | 8  | 3.05E-02 | NRD  |
| OTOF    | 8  | 24 | 6.49E-03 | NRD  |

|       |   |    |          |     |
|-------|---|----|----------|-----|
| SPTB  | 6 | 24 | 4.04E-02 | NRD |
| OBSL1 | 6 | 30 | 1.59E-02 | NRD |
| ANO3  | 5 | 13 | 1.59E-02 | NRD |
| ZFHX3 | 5 | 10 | 2.89E-02 | NRD |
| MYO1C | 5 | 16 | 2.37E-02 | NRD |
| CLCN1 | 5 | 21 | 2.24E-02 | NRD |

**Table S7.** Diseases included in the allele frequency database, and number (N) of cases of each disease. Diseases are classified in three categories: i) Inherited Retinal Dystrophies (IRD), ii) other eye related diseases (OERD) and iii) non-related diseases (NRD).

| Disease                       | N           | Group |
|-------------------------------|-------------|-------|
| Inherited retinal dystrophies | 1766        | IRD   |
| Mixed conditions              | 1648        | NRD   |
| Encephalopathies-ID-Epilepsy  | 735         | NRD   |
| Cardiopathy                   | 325         | NRD   |
| Peripheral neuropathies       | 209         | NRD   |
| Optic atrophy                 | 200         | OERD  |
| Hearing loss                  | 149         | NRD   |
| Polymalformative syndromes    | 123         | NRD   |
| Neurodegeneration             | 123         | NRD   |
| Congenital eye defects        | 107         | OERD  |
| Nephropathy                   | 90          | NRD   |
| Corneal Dystrophy             | 80          | OERD  |
| Metabolic                     | 65          | NRD   |
| Myopathy                      | 63          | NRD   |
| <b>TOTAL</b>                  | <b>5683</b> |       |

**Table S8.** Gene panel used in the diagnosis of cases with inherited retinal dystrophies (IRD).

| Gene     |        |        |         |        |
|----------|--------|--------|---------|--------|
| ABCA4    | GUCY2D | RBP3   | BBS9    | NR2F1  |
| ABHD12   | HGSNAT | RBP4   | C5orf42 | OTX2   |
| ADAM9    | HK1    | RCBTB1 | CC2D2A  | PANK2  |
| ADAMTS18 | HMCN1  | RD3    | CDH23   | PAX2   |
| ADGRV1   | IDH3B  | RDH12  | CDH3    | PCDH15 |
| ADIPOR1  | IFT140 | RDH5   | CEP164  | PDZD7  |
| AFG3L2   | IFT172 | RGR    | CEP41   | PEX1   |
| AHR      | IMPDH1 | RGS9   | CIB2    | PEX2   |
| AIPL1    | IMPG2  | RGS9BP | CISD2   | PEX6   |
| ARL3     | ITM2B  | RHO    | CLN3    | PEX7   |
| ARL6     | KCNJ13 | RIMS1  | CLN5    | PGK1   |

|          |         |          |         |          |
|----------|---------|----------|---------|----------|
| ATF6     | KCNV2   | RLBP1    | CLN6    | PHYH     |
| BBS1     | KLHL7   | ROM1     | CLN8    | PNPLA6   |
| BBS2     | LCA5    | RP1      | CNNM4   | POMGNT1  |
| BEST1    | LRAT    | RP1L1    | COL11A1 | PPT1     |
| C2orf71  | LRIT3   | RP2      | COL11A2 | PRPS1    |
| C8orf37  | MAK     | RP9      | COL2A1  | RPGRIP1L |
| CA4      | MERTK   | RPE65    | COL9A1  | SDCCAG8  |
| CABP4    | MFRP    | RPGR     | COL9A2  | SLC41A1  |
| CACNA1F  | MFSD8   | RPGRIP1  | COL9A3  | SLC9A6   |
| CACNA2D4 | MKKS    | RS1      | CTSD    | SPG7     |
| CDHR1    | MKS1    | SAG      | DNAJC5  | TCTN1    |
| CEP290   | NDP     | SEMA4A   | DYNC2H1 | TCTN2    |
| CERKL    | NEUROD1 | SLC24A1  | FLVCR1  | TIMM8A   |
| CHM      | NMNAT1  | SNRNP200 | GALE    | TMEM138  |
| CLRN1    | NR2E3   | SPATA7   | GLIS2   | TMEM216  |
| CNGA1    | NRL     | TEAD1    | GNPTG   | TMEM237  |
| CNGA3    | NYX     | TIMP3    | GRN     | TMEM67   |
| CNGB1    | OAT     | TMEM126A | HARS    | TPP1     |
| CNGB3    | OFD1    | TOPORS   | HMX1    | TREX1    |
| CRB1     | OPA1    | TRPM1    | IFT80   | TRIM32   |
| CRX      | OPA3    | TSPAN12  | INPP5E  | TTC21B   |
| CYP4V2   | OPN1SW  | TTC8     | INVS    | TUB      |
| DHDDS    | PAX6    | TTPA     | IQCB1   | TUBGCP6  |
| EFEMP1   | PDE6A   | TULP1    | JAG1    | UNC119   |
| ELOVL4   | PDE6B   | USH2A    | KIF11   | USH1C    |
| EYS      | PDE6C   | ZNF513   | KIF7    | USH1G    |
| FAM161A  | PDE6G   | AHI1     | LAMA1   | VCAN     |
| FSCN2    | PDE6H   | ALMS1    | LRP5    | VPS13B   |
| FZD4     | PITPNM3 | ALDH3A2  | LZTFL1  | WDPCP    |
| GDF6     | PLA2G5  | ANTXR1   | MFN2    | WDR19    |
| GNAT1    | PRCD    | ARL13B   | MKKS    | WFS1     |
| GNAT2    | PROM1   | ATXN7    | MTTP    | WHRN     |
| GNB3     | PRPF3   | B9D1     | MVK     | XPNPEP3  |
| GPR179   | PRPF31  | B9D2     | MYO7A   | ZNF423   |
| GRK1     | PRPF6   | BBS10    | NBAS    |          |
| GRM6     | PRPF8   | BBS12    | NEK8    |          |

|        |       |      |       |
|--------|-------|------|-------|
| GUCA1A | PRPH2 | BBS4 | NPHP1 |
| GUCA1B | RAX2  | BBS5 | NPHP3 |
|        | RB1   | BBS7 | NPHP4 |

**Table S9.** Genes classified as involved in other eye related diseases (OERD). The list includes all genes linked with the HPO term “Eye Disease” – HP:0000478, but those included in the Table S8.

| Gene     |        |         |          |         |        |         |
|----------|--------|---------|----------|---------|--------|---------|
| AAAS     | CENPJ  | EPHX2   | HSD3B7   | MYH3    | PRKG1  | SPEF2   |
| AARS2    | CEP152 | EPM2A   | HSF4     | MYH8    | PRMT7  | SPG11   |
| AASS     | CEP57  | ERBB3   | HSPD1    | MYH9    | PRNP   | SPINT2  |
| ABCA1    | CEP85L | ERCC1   | HSPG2    | MYLK    | PROC   | SPR     |
| ABCA12   | CFH    | ERCC2   | HTRA1    | MYO18B  | PROK2  | SPRED1  |
| ABCA2    | CFHR1  | ERCC3   | HTT      | MYO5A   | PROKR2 | SPRY4   |
| ABCA7    | CFHR3  | ERCC4   | HUWE1    | MYO6    | PROP1  | SPTBN2  |
| ABCB7    | CFI    | ERCC5   | HYDIN    | MYO9A   | PROS1  | SQSTM1  |
| ABCC6    | CFL2   | ERCC6   | HYLS1    | MYOC    | PRRX1  | SRC     |
| ABCC8    | CHAT   | ERCC8   | ICOS     | MYOD1   | PRSS12 | SRCAP   |
| ABCC9    | CHD3   | ERLIN2  | IDS      | MYPN    | PRSS56 | SRD5A3  |
| ABCD1    | CHD7   | ERMARD  | IDUA     | MYT1L   | PRX    | SREBF1  |
| ABCD4    | CHD8   | ESCO2   | IER3IP1  | NAA10   | PSAP   | SRPX2   |
| ABCG8    | CHEK2  | ESPN    | IFIH1    | NAGA    | PSAT1  | SRY     |
| ABHD5    | CHMP1A | ESR1    | IFITM5   | NARS2   | PSEN1  | ST14    |
| ABL1     | CHMP4B | ETFA    | IFNG     | NCF1    | PSEN2  | ST3GAL3 |
| ACADS    | CHN1   | ETFB    | IFT122   | NCF2    | PTCH1  | ST3GAL5 |
| ACADSB   | CHRD1  | ETFDH   | IFT43    | NCF4    | PTCH2  | STAT3   |
| ACBD5    | CHRNA1 | ETHE1   | IGBP1    | NDE1    | PTF1A  | STAT4   |
| ACO2     | CHRNA3 | EVC     | IGF1     | NDN     | PTH    | STIM1   |
| ACOX1    | CHRNA7 | EVC2    | IGF1R    | NDRG1   | PTH1R  | STOX1   |
| ACSL4    | CHRN1  | EXOSC3  | IGF2     | NDST1   | PTPN11 | STRA6   |
| ACTA1    | CHRNA1 | EXOSC9  | IGFBP7   | NDUFA1  | PTPN22 | STRADA  |
| ACTB     | CHRNA1 | EXT2    | IGLL1    | NDUFA10 | PTPN23 | STS     |
| ACTG1    | CHRNA1 | EXTL3   | IGSF3    | NDUFA11 | PTS    | STT3A   |
| ACTN2    | CHST3  | EYA1    | IKZF1    | NDUFA12 | PUF60  | STT3B   |
| ACVR1    | CHST6  | EZH2    | IL10     | NDUFA13 | PUS1   | STX11   |
| ACY1     | CHSY1  | FA2H    | IL11RA   | NDUFA2  | PUS3   | STX16   |
| ADAM17   | CIC    | FAM126A | IL12B    | NDUFA4  | PWRN1  | STXBP1  |
| ADAM22   | CITED2 | FAM20C  | IL17F    | NDUFA6  | PXDN   | SUCLA2  |
| ADAMTS10 | CLCC1  | FAN1    | IL17RA   | NDUFA9  | PYCR1  | SUFU    |
| ADAMTS17 | CLCN2  | FANCA   | IL1RAPL1 | NDUFAF1 | RAB18  | SUMF1   |

|          |         |         |         |         |          |         |
|----------|---------|---------|---------|---------|----------|---------|
| ADAMTS2  | CLCN4   | FANCB   | IL23R   | NDUFAF2 | RAB23    | SUOX    |
| ADAMTSL4 | CLCN7   | FANCC   | IL2RA   | NDUFAF4 | RAB27A   | SUZ12   |
| ADAR     | CLCNKB  | FANCD2  | IL6     | NDUFAF5 | RAB28    | SYNE1   |
| ADARB1   | CLDN16  | FANCE   | IL6ST   | NDUFAF6 | RAB39B   | SYNE2   |
| ADGRG1   | CLDN19  | FANCF   | INPP5K  | NDUFB11 | RAB3GAP1 | SYNGAP1 |
| ADK      | CLEC7A  | FANCG   | INPPL1  | NDUFB3  | RAB3GAP2 | SYT14   |
| ADNP     | CNBP    | FANCI   | INS     | NDUFB9  | RAC1     | SYT2    |
| ADSL     | CNKSRR2 | FANCL   | INSR    | NDUFS1  | RAD21    | TAB2    |
| AGA      | CNOT3   | FANCM   | IPW     | NDUFS2  | RAD50    | TAC3    |
| AGK      | CNTN1   | FARS2   | IQSEC2  | NDUFS4  | RAD51    | TACO1   |
| AGL      | COA3    | FAS     | IRX5    | NDUFS6  | RAD51C   | TACR3   |
| Aug-02   | COG1    | FASLG   | ISCA2   | NDUFS7  | RAF1     | TACSTD2 |
| AGRN     | COG4    | FASTKD2 | ITCH    | NDUFV1  | RAG1     | TAF1    |
| AGTPBP1  | COG5    | FBLN1   | ITGA2B  | NDUFV2  | RAG2     | TAF2    |
| AGXT     | COG6    | FBLN5   | ITGA3   | NEB     | RAI1     | TARDBP  |
| AHCY     | COL12A1 | FBN2    | ITGA7   | NEDD4L  | RALGAPA1 | TAT     |
| AHSG     | COL17A1 | FBXO11  | ITGB3   | NEFL    | RANBP2   | TBC1D23 |
| AIFM1    | COL18A1 | FBXO7   | ITGB6   | NEK1    | RAPSN    | TBC1D24 |
| AIMP1    | COL1A1  | FBXW11  | ITPA    | NF1     | RARS2    | TBCD    |
| AIP      | COL1A2  | FDFT1   | ITPR1   | NFIX    | RASGRP1  | TBCE    |
| AIRE     | COL25A1 | FERMT1  | JAK2    | NFKB2   | RAX      | TBK1    |
| AKT1     | COL4A1  | FGD1    | JAM3    | NGF     | RBBP8    | TBL1XR1 |
| AKT3     | COL4A2  | FGF10   | KANK1   | NGLY1   | RBM10    | TBP     |
| ALDH18A1 | COL4A3  | FGF14   | KANSL1  | NHLRC1  | RBM8A    | TBX1    |
| ALDH5A1  | COL4A4  | FGF20   | KAT5    | NHP2    | RBPJ     | TBX15   |
| ALDH6A1  | COL4A5  | FGF3    | KAT6A   | NHS     | RECQL4   | TBX2    |
| ALDH7A1  | COL4A6  | FGF8    | KAT6B   | NIN     | RELN     | TBX22   |
| ALDOA    | COL5A1  | FGF9    | KBTBD13 | NIPAL4  | RFT1     | TBX4    |
| ALDOB    | COL5A2  | FGFR1   | KCNA1   | NIPBL   | RIC1     | TCF3    |
| ALG1     | COL6A1  | FGFR2   | KCNA4   | NKX2-5  | RIN2     | TCF4    |
| ALG11    | COL6A2  | FGFR3   | KCNC3   | NKX2-6  | RIPK4    | TCIRG1  |
| ALG12    | COL6A3  | FGFRL1  | KCND3   | NKX3-2  | RNASEH2A | TCOF1   |
| ALG13    | COL7A1  | FH      | KCNJ1   | NLRP1   | RNASEH2B | TCTN3   |
| ALG14    | COL8A2  | FHL1    | KCNJ11  | NLRP3   | RNASET2  | TDO2    |
| ALG2     | COLEC10 | FIG4    | KCNJ2   | NME8    | RNF168   | TDP1    |
| ALG3     | COLEC11 | FKBP10  | KCNJ6   | NOD2    | ROBO3    | TDRD7   |
| ALG6     | COLQ    | FKBP14  | KCNMA1  | NODAL   | ROR2     | TECR    |
| ALG8     | COMT    | FKRP    | KCNN3   | NOG     | RORA     | TEK     |
| ALG9     | COQ2    | FKTN    | KCNQ3   | NOP56   | RPIA     | TELO2   |
| ALOX12B  | COQ5    | FLCN    | KCNQ5   | NOTCH1  | RPL11    | TERT    |
| ALOXE3   | COQ8A   | FLI1    | KCTD7   | NOTCH2  | RPL35A   | TET2    |



|          |            |         |        |          |         |           |
|----------|------------|---------|--------|----------|---------|-----------|
| ALPL     | CORIN      | FLNA    | KDM5C  | NOTCH3   | RPL5    | TFAP2A    |
| ALS2     | COX10      | FLNB    | KDM6A  | NPAP1    | RPS10   | TFAP2B    |
| ALX1     | COX14      | FLT4    | KDM6B  | NPC1     | RPS19   | TFG       |
| ALX3     | COX15      | FMN2    | KERA   | NPC2     | RPS24   | TFRC      |
| ALX4     | COX6B1     | FMR1    | KIF1A  | NPM1     | RPS26   | TGFB1     |
| AMACR    | COX7B      | FOXC1   | KIF1B  | NRAS     | RPS28   | TGFB2     |
| AMER1    | CP         | FOXC2   | KIF21A | NRXN1    | RPS6KA3 | TGFB3     |
| ANAPC1   | CPT2       | FOXE3   | KIF5A  | NSD1     | RPS7    | TGFB1     |
| ANK1     | CR2        | FOXG1   | KISS1  | NSD2     | RRAS2   | TGIF1     |
| ANKH     | CRADD      | FOXJ1   | KISS1R | NSDHL    | RRM2B   | TGM1      |
| ANKRD11  | CRBN       | FOXP1   | KIT    | NSMF     | RSPH4A  | TGM5      |
| ANO10    | CREBBP     | FOXRED1 | KITLG  | NSUN2    | RSPH9   | TGM6      |
| ANOS1    | CRLF1      | FRAS1   | KLF11  | NTF4     | RSRC1   | TH        |
| AP1S1    | CRTAP      | FREM1   | KLHL41 | NTRK1    | RTTN    | THOC2     |
| AP1S2    | CRYAA      | FREM2   | KMT2C  | NTRK2    | RUBCN   | THPO      |
| AP3B1    | CRYAB      | FRG1    | KMT2D  | NUBPL    | RUNX2   | THRA      |
| AP3B2    | CRYBA1     | FRMD7   | KMT2E  | NUP62    | SACS    | THRB      |
| AP3D1    | CRYBA4     | FRMPD4  | KNL1   | OCA2     | SALL1   | TK2       |
| AP4B1    | CRYBB1     | FTL     | KRAS   | OCLN     | SALL4   | TMCO1     |
| AP4E1    | CRYBB2     | FUCA1   | KRIT1  | OCRL     | SAMD9   | TMEM231   |
| AP4S1    | CRYBB3     | FUS     | KRT1   | ODC1     | SAMHD1  | TMEM70    |
| AP5Z1    | CRYGB      | FUT8    | KRT10  | OGT      | SAR1B   | TMTC3     |
| APOA1    | CRYGC      | FXN     | KRT12  | OPHN1    | SARDH   | TNFAIP3   |
| APOC2    | CRYGD      | FYCO1   | KRT14  | OPN1LW   | SATB2   | TNFRSF11A |
| APOE     | CRYGS      | GABRA1  | KRT3   | OPN1MW   | SBDS    | TNFRSF11B |
| APP      | CSF1R      | GABRA2  | KRT5   | OPTN     | SBF2    | TNFRSF13B |
| APTX     | CSGALNACT1 | GABRA5  | KRT74  | ORAI1    | SC5D    | TNFRSF13C |
| ARHGAP31 | CST3       | GABRB3  | KRT83  | ORC1     | SCARF2  | TNFRSF1A  |
| ARHGDIA  | CST6       | GABRD   | KRT86  | OSMR     | SCN1A   | TNFSF11   |
| ARID1A   | CSTA       | GABRG2  | L1CAM  | OSTM1    | SCN1B   | TNFSF4    |
| ARID1B   | CTC1       | GAD1    | L2HGDH | P3H1     | SCN2A   | TOR1A     |
| ARSA     | CTDP1      | GALC    | LAMA2  | P3H2     | SCN3A   | TP53RK    |
| ARSB     | CTLA4      | GALK1   | LAMA3  | PACS1    | SCN4A   | TP63      |
| ARX      | CTNNB1     | GALNS   | LAMB1  | PAFAH1B1 | SCN8A   | TPI1      |
| ASAH1    | CTNND1     | GALNT2  | LAMB2  | PAH      | SCN9A   | TPM2      |
| ASB10    | CTNS       | GALNT3  | LAMB3  | PARK7    | SCP2    | TPM3      |
| ASNS     | CTSA       | GALT    | LAMC2  | PAX1     | SCYL1   | TRAF3IP1  |
| ASPA     | CTSK       | GAN     | LAMC3  | PAX3     | SDHA    | TRAF3IP2  |
| ASPM     | CYB5A      | GAS2L2  | LAMP2  | PAX4     | SDHAF1  | TRAK1     |
| ASXL1    | CYB5R3     | GATA1   | LARGE1 | PAX7     | SEC23A  | TRAPPC2   |
| ATCAY    | CYBA       | GATA2   | LARS2  | PBX1     | SEC23B  | TRAPPC9   |

|          |         |        |         |        |          |         |
|----------|---------|--------|---------|--------|----------|---------|
| ATIC     | CYBB    | GATA3  | LAS1L   | PCK1   | SELENON  | TREM2   |
| ATM      | CYP1B1  | GATA4  | LBR     | PCLO   | SEMA3A   | TRIM37  |
| ATN1     | CYP24A1 | GATA5  | LCAT    | PCNT   | SEMA3E   | TRIO    |
| ATOH7    | CYP27A1 | GATA6  | LDLRAP1 | PDCD1  | SEPSECS  | TRIP11  |
| ATP13A2  | CYP7B1  | GBA    | LEMD3   | PDCD10 | SERAC1   | TRIP12  |
| ATP1A2   | DAG1    | GCDH   | LETM1   | PDE4D  | SERPINC1 | TRMT1   |
| ATP1A3   | DARS2   | GCH1   | LG14    | PDGFB  | SERPING1 | TRPV3   |
| ATP2B2   | DBH     | GCK    | LHX3    | PDGFRB | SERPINH1 | TRPV4   |
| ATP2B3   | DCC     | GCNT2  | LHX4    | PDHA1  | SERPINI1 | TRRAP   |
| ATP6AP1  | DCN     | GDF3   | LIFR    | PDHB   | SETBP1   | TSEN2   |
| ATP6V0A2 | DCTN1   | GDF5   | LIG4    | PDHX   | SETD2    | TSEN34  |
| ATP8A2   | DCX     | GNDF   | LIM2    | PDP1   | SETX     | TSFM    |
| ATR      | DDB2    | GEMIN4 | LINS1   | PDSS1  | SF3B1    | TSHR    |
| ATRX     | DDC     | GFM1   | LIPH    | PDSS2  | SF3B4    | TSR2    |
| ATXN1    | DDHD2   | GFPT1  | LMBR1   | PDX1   | SH2B3    | TTBK2   |
| ATXN10   | DDOST   | GGCX   | LMNB1   | PDXK   | SH3BP2   | TTC19   |
| ATXN2    | DDR2    | GHR    | LMOD3   | PDYN   | SH3PXD2B | TTC37   |
| ATXN3    | DDX11   | GIGYF2 | LMX1B   | PEPD   | SH3TC2   | TTI2    |
| ATXN8OS  | DDX3X   | GJA1   | LOX     | PEX10  | SHANK3   | TTR     |
| AUH      | DDX58   | GJA3   | LOXL1   | PEX11B | SHH      | TUBB2B  |
| AUTS2    | DEAF1   | GJA5   | LPL     | PEX12  | SHOC2    | TUBB3   |
| AVP      | DGCR2   | GJA8   | LRBA    | PEX13  | SHROOM4  | TUBB6   |
| B3GALNT2 | DGCR6   | GJB1   | LRP1    | PEX14  | SIGMAR1  | TUBGCP4 |
| B3GLCT   | DGCR8   | GJB2   | LRP2    | PEX16  | SIK3     | TUSC3   |
| B4GALNT1 | DGUOK   | GJB3   | LRP4    | PEX19  | SIL1     | TWIST1  |
| B4GALT7  | DHCR24  | GJB6   | LRPAP1  | PEX26  | SIX1     | TWIST2  |
| BANF1    | DHCR7   | GJC2   | LRPPRC  | PEX3   | SIX3     | TWNK    |
| BAP1     | DHODH   | GK     | LRRC8A  | PEX5   | SIX6     | TXN2    |
| BCAP31   | DHX37   | GLB1   | LRRK2   | PGAP2  | SKI      | TYMP    |
| BCL10    | DIAPH1  | GLE1   | LTBP2   | PGAP3  | SLC12A3  | TYR     |
| BCL11A   | DICER1  | GLI1   | LTBP4   | PHF21A | SLC12A6  | TYRP1   |
| BCOR     | DIS3L2  | GLI2   | LYST    | PHF6   | SLC16A12 | UBA1    |
| BCORL1   | DKC1    | GLI3   | MADD    | PHGDH  | SLC16A2  | UBA5    |
| BCR      | DLAT    | GLIS3  | MAF     | PHIP   | SLC17A5  | UBE2A   |
| BCS1L    | DLD     | GLRB   | MAFA    | PHOX2A | SLC19A2  | UBE3A   |
| BEAN1    | DLG3    | GLRX5  | MAFB    | PHOX2B | SLC19A3  | UBIAD1  |
| BFSP1    | DLG4    | GM2A   | MAGEL2  | PI4KA  | SLC1A2   | UBR1    |
| BFSP2    | DLL1    | GNAI3  | MALT1   | PIZO2  | SLC1A3   | UCHL1   |
| BGN      | DLX5    | GNAQ   | MAN1B1  | PIGA   | SLC20A2  | UGP2    |
| BIN1     | DMPK    | GNAS   | MAN2B1  | PIGL   | SLC24A5  | UGT1A1  |
| BLK      | DNAAF1  | GNB5   | MANBA   | PIGN   | SLC25A1  | UMPS    |

|          |          |         |          |         |          |         |
|----------|----------|---------|----------|---------|----------|---------|
| BLM      | DNAAF2   | GENE    | MAP2K1   | PIGO    | SLC25A13 | UNC80   |
| BLNK     | DNAAF3   | GNPAT   | MAP2K2   | PIGV    | SLC25A15 | UQCRFS1 |
| BLOC1S5  | DNAAF5   | GNPTAB  | MAPK1    | PIK3CA  | SLC25A19 | UROC1   |
| BLOC1S6  | DNAH11   | GNRH1   | MAPKAPK3 | PIK3CD  | SLC25A20 | UROS    |
| BMP1     | DNAH5    | GNRHR   | MAPT     | PIK3R1  | SLC25A22 | USB1    |
| BMP2     | DNAH9    | GORAB   | MARS2    | PIK3R2  | SLC25A4  | USP7    |
| BMP4     | DNAI1    | GP1BA   | MASP1    | PIK3R5  | SLC26A2  | USP9X   |
| BMPER    | DNAI2    | GP1BB   | MBD5     | PIKFYVE | SLC29A3  | VANGL2  |
| BNC2     | DNAJC19  | GPC3    | MBOAT7   | PINK1   | SLC2A1   | VAX1    |
| BOLA3    | DNAJC6   | GPC4    | MBTPS2   | PITX1   | SLC2A10  | VCP     |
| BRAF     | DNAL1    | GPIHBP1 | MCM3AP   | PITX2   | SLC33A1  | VIM     |
| BRAT1    | DNASE1L3 | GPR143  | MCM5     | PITX3   | SLC35A1  | VLDLR   |
| BRIP1    | DNM1     | GRHL2   | MCOLN1   | PLA2G6  | SLC35A2  | VMA21   |
| BRPF1    | DNM1L    | GRIA3   | MECP2    | PLCB4   | SLC35C1  | VPS13A  |
| BTK      | DNM2     | GRID2   | MED12    | PLCD1   | SLC36A2  | VPS35   |
| BUB1     | DNMT1    | GRIK2   | MED13    | PLCG2   | SLC37A4  | VSX1    |
| BUB1B    | DNMT3A   | GRIN1   | MED13L   | PLEC    | SLC39A13 | VSX2    |
| C19orf12 | DNMT3B   | GRIN2A  | MED23    | PLEKHG2 | SLC39A4  | WAS     |
| C1QTNF5  | DOCK3    | GRIN2B  | MED25    | PLEKHM1 | SLC3A1   | WASHC4  |
| C1R      | DOCK6    | GRIP1   | MEF2C    | PLG     | SLC40A1  | WASHC5  |
| C9orf72  | DOCK7    | GRM1    | MEFV     | PLOD1   | SLC45A2  | WDFY3   |
| CA2      | DOCK8    | GRM7    | MEGF8    | PLOD3   | SLC4A11  | WDR11   |
| CA8      | DOK7     | GSC     | MEIS2    | PLP1    | SLC4A4   | WDR35   |
| CACNA1A  | DPAGT1   | GSN     | METTL5   | PMM2    | SLC52A2  | WDR36   |
| CACNA1D  | DPM1     | GSR     | MFF      | PMP22   | SLC52A3  | WDR4    |
| CACNA1E  | DPP6     | GSS     | MGP      | PMS1    | SLC5A7   | WDR45   |
| CACNA1G  | DPYD     | GTF2H5  | MID1     | PNKD    | SLC6A19  | WDR45B  |
| CACNA1H  | DSE      | GUSB    | MIF      | PNPLA1  | SLC6A20  | WDR81   |
| CACNA2D2 | DSG4     | HACE1   | MIP      | PNPO    | SLC6A3   | WIPF1   |
| CACNB4   | DST      | HADH    | MIR184   | PNPT1   | SLC6A8   | WNK1    |
| CACNG2   | DTNBP1   | HADHA   | MITF     | POC1A   | SLC6A9   | WNT10A  |
| CALR     | DVL1     | HADHB   | MKRN3    | POGZ    | SLCO2A1  | WNT10B  |
| CAMK2G   | DYNC1H1  | HBA2    | MLH3     | POLD1   | SLITRK6  | WNT3    |
| CAMTA1   | DYNC2L1  | HBB     | MLPH     | POLG    | SLX4     | WNT5A   |
| CANT1    | DYRK1A   | HCCS    | MLXIPL   | POLG2   | SMARCA4  | WRAP53  |
| CASK     | EARS2    | HCN1    | MMADHC   | POLH    | SMARCAL1 | WRN     |
| CASP10   | EBP      | HCRT    | MME      | POLR1C  | SMARCB1  | WWOX    |
| CASR     | EDN1     | HDAC4   | MMP1     | POLR1D  | SMARCE1  | XPA     |
| CAV1     | EDN3     | HDAC6   | MMP14    | POLR3A  | SMC1A    | XPC     |
| CBL      | EDNRA    | HDAC8   | MMP2     | POLR3B  | SMC3     | XRCC1   |
| CBS      | EDNRB    | HERC2   | MN1      | POMGNT2 | SMCHD1   | XRCC2   |

|          |         |         |        |          |            |          |
|----------|---------|---------|--------|----------|------------|----------|
| CC2D1A   | EFEMP2  | HESX1   | MOCS1  | POMK     | SMO        | XRCC4    |
| CCBE1    | EFHC1   | HEXA    | MOCS2  | POMT1    | SMOC1      | XYLT1    |
| CCDC22   | EFNB1   | HEXB    | MOGS   | POMT2    | SMPD1      | XYLT2    |
| CCDC39   | EGFR    | HGD     | MPC1   | POR      | SMS        | YAP1     |
| CCDC40   | EGR2    | HIBCH   | MPDZ   | PORCN    | SNAI2      | YARS2    |
| CCDC88C  | EHMT1   | HLCS    | MPL    | POU1F1   | SNAP25     | YIF1B    |
| CCM2     | EIF2AK3 | HMGA2   | MPV17  | POU3F4   | SNAP29     | YY1      |
| CCND1    | EIF2B1  | HNF4A   | MPZ    | POU6F2   | SNCA       | ZBTB16   |
| CD19     | EIF2B2  | HNMT    | MRE11  | PPIB     | SNIP1      | ZBTB18   |
| CD247    | EIF2B3  | HNRNPU  | MSMO1  | PPM1D    | SNORD115-1 | ZBTB24   |
| CD27     | EIF2B4  | HOXA1   | MSX2   | PPP1R17  | SNORD116-1 | ZC3H14   |
| CD79A    | EIF2B5  | HOXA13  | MTAP   | PPP2R1A  | SNRPN      | ZDHHHC9  |
| CD79B    | EIF2S3  | HOXB1   | MTFMT  | PPP2R2B  | SNX10      | ZEB1     |
| CD96     | EIF4G1  | HPGD    | MTHFR  | PPP3CA   | SOBP       | ZEB2     |
| CDC42    | ELN     | HPS1    | MTHFS  | PQBP1    | SOS1       | ZFHX4    |
| CDH1     | ELP4    | HPS3    | MTM1   | PRDM16   | SOST       | ZFPM2    |
| CDH15    | EMD     | HPS4    | MTMR14 | PRDM5    | SOX2       | ZFYVE26  |
| CDK4     | ENPP1   | HPS5    | MTO1   | PRDX1    | SOX3       | ZIC1     |
| CDK5RAP2 | ENTPD1  | HPS6    | MTPAP  | PREPL    | SOX5       | ZIC2     |
| CDKL5    | EP300   | HRAS    | MTR    | PRF1     | SOX6       | ZIC3     |
| CDKN1C   | EPAS1   | HS2ST1  | MTRR   | PRICKLE3 | SOX9       | ZMPSTE24 |
| CDKN2A   | EPB41L1 | HS6ST1  | MUSK   | PRKAR1A  | SPAST      | ZMYND11  |
| CDON     | EPCAM   | HSD11B2 | MYF5   | PRKCG    | SPATA5     | ZNF335   |
| CEL      | EPHA2   | HSD17B4 | MYH2   | PRKDC    | SPECC1L    | ZNF365   |

**Table S10.** Genes in the database of allelic frequencies not involved in an eye related disease (NRD).

| Gene    |       |        |        |       |        |        |
|---------|-------|--------|--------|-------|--------|--------|
| A2M     | CCRL2 | EPOR   | IDH2   | MSH3  | PRMT3  | SRGAP2 |
| A4GALT  | CCT5  | EPX    | IDO1   | MSH4  | PRMT9  | SRGAP3 |
| A4GNT   | CD109 | ERAP1  | IFI30  | MSMB  | PRND   | SRI    |
| AADAC   | CD14  | ERAP2  | IFI44L | MSR1  | PRODH  | SRP72  |
| AADACL2 | CD151 | ERBB2  | IFITM3 | MSRA  | PROK1  | SRPX   |
| AAGAB   | CD177 | ERBB4  | IFNA10 | MSRB3 | PROKR1 | SRR    |
| AARS    | CD1A  | ERI2   | IFNA17 | MST1R | PROX1  | SSH1   |
| ABAT    | CD1E  | ERMAP  | IFNA2  | MSTN  | PROZ   | SSPN   |
| ABCA10  | CD200 | ERRFI1 | IFNAR1 | MSX1  | PRPH   | SST    |
| ABCA13  | CD207 | ESAM   | IFNAR2 | MT1A  | PRSS1  | SSTR5  |
| ABCA3   | CD209 | ESR2   | IFNGR1 | MT2A  | PRSS8  | SSX7   |

|        |          |        |         |         |         |            |
|--------|----------|--------|---------|---------|---------|------------|
| ABCB1  | CD22     | ESRRB  | IFNGR2  | MTA1    | PRTG    | ST3GAL1    |
| ABCB11 | CD226    | ESRRG  | IFNL3   | MTA2    | PSCA    | ST3GAL2    |
| ABCB4  | CD244    | ETNPPL | IFRD1   | MTCH2   | PSMA6   | ST3GAL4    |
| ABCC1  | CD2AP    | ETS1   | IFT88   | MTHFD1  | PSMC2   | ST3GAL6    |
| ABCC11 | CD320    | ETV4   | IGF2BP2 | MTHFD1L | PSMC3IP | ST5        |
| ABCC2  | CD36     | ETV6   | IGF2R   | MTMR2   | PSMD7   | ST6GAL1    |
| ABCC3  | CD38     | EVI5   | IGFALS  | MTMR9   | PSPH    | ST6GAL2    |
| ABCC4  | CD3D     | EWSR1  | IGFBP1  | MTNR1A  | PSTPIP1 | ST6GALNAC1 |
| ABCD3  | CD3E     | EXO1   | IGFBP3  | MTNR1B  | PSTPIP2 | ST6GALNAC2 |
| ABCG1  | CD3G     | EXO5   | IGFBP5  | MTSS1   | PTAFR   | ST6GALNAC3 |
| ABCG2  | CD4      | EXOC4  | IGHMBP2 | MTUS1   | PTCHD1  | ST6GALNAC4 |
| ABI3BP | CD40     | EXPH5  | IGSF1   | MUC1    | PTCHD3  | ST6GALNAC5 |
| ABL2   | CD40LG   | EXT1   | IHH     | MUC13   | PTCSC3  | ST6GALNAC6 |
| ABO    | CD44     | EXTL1  | IKBIP   | MUC15   | PTGDR   | ST7        |
| ACACA  | CD46     | EXTL2  | IKBKAP  | MUC2    | PTGDR2  | ST8SIA1    |
| ACACB  | CD5      | EYA4   | IKBKB   | MUC3A   | PTGDS   | ST8SIA2    |
| ACAD10 | CD55     | F10    | IKZF3   | MUC4    | PTGER2  | ST8SIA3    |
| ACAD11 | CD58     | F11    | IL10RA  | MUC5B   | PTGER4  | ST8SIA4    |
| ACAD8  | CD59     | F12    | IL10RB  | MUC6    | PTGES2  | ST8SIA5    |
| ACAD9  | CD72     | F13A1  | IL11    | MUC7    | PTGIR   | ST8SIA6    |
| ACADL  | CD74     | F13B   | IL12A   | MURC    | PTGIS   | STAR       |
| ACADM  | CD80     | F2     | IL12RB1 | MUS81   | PTGS1   | STARD9     |
| ACADVL | CD81     | F2R    | IL12RB2 | MUT     | PTGS2   | STAT1      |
| ACAN   | CD86     | F2RL1  | IL13    | MX1     | PTHLH   | STAT5B     |
| ACAT1  | CD8A     | F3     | IL16    | MXI1    | PTK7    | STAT6      |
| ACAT2  | CDA      | F5     | IL17A   | MYB     | PTPN1   | STEAP3     |
| ACBD6  | CDAN1    | F7     | IL17RB  | MYBL2   | PTPN12  | STEAP4     |
| ACCS   | CDC42BPB | F8     | IL17REL | MYBPC1  | PTPN13  | STH        |
| ACE    | CDC6     | F9     | IL18    | MYC     | PTPN14  | STIL       |
| ACHE   | CDC73    | FAAH   | IL18R1  | MYCL    | PTPN2   | STK10      |
| ACKR1  | CDCA7L   | FAAH2  | IL18RAP | MYCN    | PTPN21  | STK11IP    |
| ACLY   | CDH12    | FABP1  | IL19    | MYEF2   | PTPN6   | STK3       |
| ACP1   | CDH13    | FABP2  | IL1A    | MYF6    | PTPRB   | STK32A     |
| ACP5   | CDH5     | FABP3  | IL1B    | MYH13   | PTPRC   | STK33      |
| ACSF3  | CDH8     | FABP4  | IL1R1   | MYH14   | PTPRD   | STK35      |
| ACSL5  | CDK11A   | FABP6  | IL1RL1  | MYH15   | PTPRF   | STK36      |
| ACSL6  | CDK16    | FABP7  | IL1RN   | MYH6    | PTPRJ   | STK39      |
| ACSM2B | CDK5R1   | FADD   | IL2     | MYL1    | PTPRK   | STK4       |

|          |            |         |        |        |           |         |
|----------|------------|---------|--------|--------|-----------|---------|
| ACSM3    | CDK5RAP3   | FADS2   | IL20RA | MYLIP  | PTPRN2    | STMN1   |
| ACTN3    | CDK6       | FAH     | IL20RB | MYLK2  | PTPRO     | STRC    |
| ACTN4    | CDK7       | FAM104A | IL21   | MYO15A | PTPRQ     | STX1A   |
| ACVR1B   | CDKAL1     | FAM120A | IL21R  | MYO1A  | PTPRT     | STXBP2  |
| ACVR1C   | CDKL3      | FAM134B | IL2RG  | MYO1C  | PTRF      | STXBP5  |
| ACVR2A   | CDKN1A     | FAM161B | IL3    | MYO1E  | PUS10     | SUCLG1  |
| ACVR2B   | CDKN1B     | FAM205A | IL31RA | MYO1F  | PVR       | SUCO    |
| ADA      | CDKN2B     | FAM20A  | IL36RN | MYO3A  | PVT1      | SUGCT   |
| ADAM10   | CDKN2B-AS1 | FAM47B  | IL4    | MYO5B  | PYCRL     | SULF1   |
| ADAM12   | CDKN2C     | FAM58A  | IL4R   | MYO5C  | PYGB      | SULT1A1 |
| ADAM19   | CDT1       | FAM83H  | IL5    | MYO7B  | PYGL      | SULT1C2 |
| ADAM23   | CDX2       | FAM8A1  | IL6R   | MYO9B  | PYGM      | SULT1E1 |
| ADAM33   | CEACAM16   | FAM91A1 | IL7    | MYOCD  | PYY       | SULT2A1 |
| ADAM7    | CEBPA      | FASN    | IL7R   | MYOM1  | PZP       | SULT2B1 |
| ADAMTS1  | CEBPE      | FBLIM1  | IL9    | MYOT   | QDPR      | SULT4A1 |
| ADAMTS13 | CECR2      | FBN3    | ILDR1  | MYOZ2  | QKI       | SUMO1   |
| ADAMTS16 | CELSR1     | FBP1    | ILK    | MYT1   | RAB11FIP5 | SUMO4   |
| ADAMTSL2 | CELSR2     | FBXO10  | IMMP2L | NAGLU  | RAB25     | SUN2    |
| ADAMTSL3 | CEMIP      | FBXO18  | IMMT   | NAGPA  | RAB27B    | SUPT16H |
| ADCY10   | CENPO      | FBXW4   | IMPA2  | NAIP   | RAB29     | SV2B    |
| ADCY3    | CENPP      | FBXW7   | IMPAD1 | NAMPT  | RAB2A     | SYCE2   |
| ADCY5    | CEP135     | FCAR    | IMPDH2 | NAT1   | RAB40AL   | SYCP3   |
| ADCY6    | CEP63      | FCER1A  | INF2   | NAT2   | RAB7A     | SYK     |
| ADCY9    | CEP68      | FCER2   | ING1   | NAT8L  | RABGGTA   | SYN1    |
| ADCYAP1  | CER1       | FCGR1A  | INMT   | NAV2   | RABL6     | SYN2    |
| ADD1     | CERS6      | FCGR2A  | INPP4A | NBEA   | RAC2      | SYN3    |
| ADD2     | CES1       | FCGR2B  | INPP5B | NBEAL2 | RAD21L1   | SYNGR1  |
| ADH1B    | CES2       | FCGR3A  | INPP5D | NBN    | RAD23B    | SYNM    |
| ADH1C    | CETP       | FCGR3B  | INSIG1 | NBPF1  | RAD51B    | SYNPO   |
| ADH4     | CFAP53     | FCGRT   | INSIG2 | NCALD  | RAD51D    | SYP     |
| ADH5     | CFAP57     | FCN2    | INSL3  | NCAM1  | RAD52     | SYT11   |
| ADH7     | CFC1       | FCN3    | INSL6  | NCAN   | RAD54B    | SYTL3   |
| ADIPOQ   | CFD        | FCRL3   | IQGAP1 | NCAPD2 | RAD54L    | SYTL5   |
| ADM      | CFHR2      | FECH    | IQGAP2 | NCKAP1 | RAD9A     | T       |
| ADORA1   | CFHR4      | FEM1A   | IQGAP3 | NCOA1  | RAET1L    | TAAR1   |
| ADORA2A  | CFHR5      | FEM1B   | IRAK1  | NCOA3  | RALGDS    | TAAR6   |
| ADORA3   | CFLAR      | FEN1    | IRAK3  | NCOA4  | RANGRF    | TAAR9   |
| ADRA1A   | CFP        | FERMT3  | IRAK4  | NCS1   | RAP1GDS1  | TAF15   |

|        |          |        |        |         |         |         |
|--------|----------|--------|--------|---------|---------|---------|
| ADRA2A | CFTR     | FEV    | IRF1   | NCSTN   | RARA    | TAF1C   |
| ADRA2B | CGA      | FEZF2  | IRF2   | NDOR1   | RASA1   | TAF1L   |
| ADRA2C | CGB3     | FFAR1  | IRF4   | NDST2   | RASGRP2 | TAF7L   |
| ADRB1  | CHD1L    | FFAR4  | IRF5   | NDST3   | RASSF1  | TAL1    |
| ADRB2  | CHD2     | FGA    | IRF6   | NDST4   | RASSF5  | TAL2    |
| ADRB3  | CHD6     | FGB    | IRF8   | NDUFA7  | RB1CC1  | TALDO1  |
| ADTRP  | CHDH     | FGD3   | IRGM   | NDUFA8  | RBFOX1  | TAS1R1  |
| AFF2   | CHFR     | FGD4   | IRS1   | NDUFAF7 | RBL1    | TAS1R2  |
| AFF3   | CHGA     | FGF1   | IRS2   | NDUFB1  | RBL2    | TAS2R16 |
| AFP    | CHGB     | FGF2   | IRS4   | NDUFB6  | RBM15   | TAS2R3  |
| AGBL4  | CHI3L1   | FGF23  | IRX4   | NDUFS5  | RBM20   | TAS2R38 |
| AGGF1  | CHI3L2   | FGFBP1 | ISCU   | NDUFV3  | RBM28   | TAS2R9  |
| AGMO   | CHIA     | FGFR4  | ISL1   | NEBL    | RBMXL2  | TAZ     |
| AGO1   | CHIC2    | FGG    | ISPD   | NECTIN1 | RC3H1   | TBC1D1  |
| AGPAT2 | CHIT1    | FHIT   | ITGA1  | NECTIN4 | RCAN1   | TBC1D4  |
| AGPS   | CHL1     | FHL2   | ITGA11 | NEDD4   | RDH8    | TBC1D9  |
| AGRP   | CHMP2B   | FIGLA  | ITGA2  | NEDD9   | RDX     | TBL1X   |
| AGT    | CHPF2    | FIP1L1 | ITGA4  | NEFH    | REEP1   | TBL1Y   |
| AGTR1  | CHRD     | FKBP1A | ITGA6  | NEFM    | REL     | TBX10   |
| AGTR2  | CHRFAM7A | FKBP4  | ITGA9  | NEGR1   | REN     | TBX19   |
| AGXT2  | CHRM1    | FKBP5  | ITGAE  | NEIL1   | REPS2   | TBX20   |
| AHRR   | CHRM2    | FKBP6  | ITGAM  | NEIL2   | RETN    | TBX21   |
| AHSP   | CHRM3    | FKBP8  | ITGB1  | NELFA   | REV3L   | TBX3    |
| AICDA  | CHRNA2   | FLG    | ITGB2  | NELL1   | RFC2    | TBX5    |
| AK1    | CHRNA4   | FLT1   | ITGB4  | NEU2    | RFWD2   | TBXA2R  |
| AK2    | CHRNA5   | FLT3   | ITIH1  | NEUROG3 | RFX2    | TBXAS1  |
| AK7    | CHRNA9   | FLVCR2 | ITIH3  | NEXN    | RFX5    | TCF21   |
| AK8    | CHRNB2   | FMN1   | ITIH4  | NFATC2  | RFX6    | TCF7    |
| AKAP10 | CHRNB4   | FMO1   | ITIH6  | NFATC3  | RFX8    | TCF7L1  |
| AKAP13 | CHST7    | FMO2   | ITK    | NFATC4  | RFXANK  | TCF7L2  |
| AKAP9  | CHST8    | FMO3   | ITPKC  | NFE2L1  | RFXAP   | TCN1    |
| AKR1B1 | CHSY3    | FMO4   | ITPR3  | NFE2L2  | RGMA    | TCN2    |
| AKR1C2 | CHUK     | FMO5   | ITSN2  | NFIA    | RGS2    | TCP1    |
| AKR1C3 | CIAPIN1  | FMO6P  | IVD    | NFKB1   | RGS6    | TCTE1   |
| AKR1C4 | CIDEA    | FMOD   | IYD    | NFKBIA  | RGS7    | TCTE3   |
| AKR1D1 | CIDEC    | FN1    | JAG2   | NFKBIZ  | RHAG    | TDGF1   |
| AKR7A2 | CIITA    | FN3K   | JAK3   | NFU1    | RHBDF2  | TEC     |
| AKR7A3 | CILP     | FOLH1  | JMJD1C | NGFR    | RHCE    | TECPR2  |

|          |         |          |         |           |         |          |
|----------|---------|----------|---------|-----------|---------|----------|
| AKT2     | CKM     | FOLR1    | JPH2    | NHEJ1     | RHD     | TECTA    |
| ALAD     | CLCA1   | FOXA2    | JPH3    | NICN1     | RHOB    | TEKT2    |
| ALAS2    | CLCA2   | FOXA3    | JRK     | NID1      | RHOH    | TENM4    |
| ALB      | CLCF1   | FOXD3    | JUN     | NINJ1     | RHPN2   | TEP1     |
| ALCAM    | CLCN1   | FOXE1    | JUNB    | NIP7      | RIC3    | TET1     |
| ALDH16A1 | CLCN3   | FOXF1    | JUP     | NIPA1     | RIMS3   | TEX14    |
| ALDH1A1  | CLCN5   | FOXF2    | KALRN   | NIPSNAP1  | RIOK2   | TF       |
| ALDH1A2  | CLCN6   | FOXI1    | KARS    | NIPSNAP3A | RMI1    | TFAM     |
| ALDH2    | CLCNKA  | FOXK1    | KAT2A   | NKAIN2    | RMND1   | TFB1M    |
| ALDH4A1  | CLDN1   | FOXM1    | KATNAL2 | NKX2-1    | RNASE3  | TFCP2    |
| ALG10B   | CLDN14  | FOXN1    | KCNA3   | NKX2-3    | RNASEL  | TFE3     |
| ALG5     | CLEC11A | FOXO1    | KCNA5   | NKX3-1    | RNF114  | TFF1     |
| ALK      | CLEC2D  | FOXP2    | KCNA6   | NLGN1     | RNF135  | TFPI     |
| ALOX12   | CLEC3B  | FOXP3    | KCNAB1  | NLGN2     | RNF139  | TFR2     |
| ALOX15   | CLEC4M  | FPGS     | KCNAB2  | NLGN3     | RNF170  | TG       |
| ALOX5    | CLIC2   | FPR1     | KCND2   | NLGN4X    | RNF212  | TGFBR3   |
| ALOX5AP  | CLIP2   | FPR2     | KCNE1   | NLGN4Y    | RNF213  | TGFBRAP1 |
| ALS2CL   | CLK2    | FRA10AC1 | KCNE2   | NLRP12    | RNF6    | TGM2     |
| AMBN     | CLMP    | FREM3    | KCNE3   | NLRP14    | RNLS    | THADA    |
| AMELX    | CLNK    | FRK      | KCNE4   | NLRP2     | ROBO1   | THAP1    |
| AMELY    | CLOCK   | FRMD6    | KCNE5   | NLRP7     | ROBO2   | THBD     |
| AMH      | CLPS    | FRY      | KCNH3   | NLRX1     | ROCK1   | THBS1    |
| AMHR2    | CLPTM1  | FRZB     | KCNIP1  | NMB       | ROCK2   | THBS2    |
| AMN      | CLPTM1L | FSCB     | KCNIP4  | NME1      | ROPN1L  | THBS4    |
| AMPD1    | CLSTN2  | FSHB     | KCNJ10  | NME5      | ROS1    | THSD7A   |
| AMPD3    | CLTCL1  | FSHR     | KCNJ12  | NME7      | RPA1    | TICAM1   |
| AMT      | CLU     | FST      | KCNJ15  | NMT2      | RPH3AL  | TIMM44   |
| ANG      | CLUL1   | FTCD     | KCNJ3   | NMU       | RPL21   | TIMP1    |
| ANGPT1   | CLYBL   | FTHL17   | KCNJ5   | NNT       | RPL24   | TIMP2    |
| ANGPT2   | CMA1    | FTO      | KCNJ8   | NOBOX     | RPL38   | TINAG    |
| ANGPTL4  | CMPK1   | FTSJ1    | KCNJ9   | NOD1      | RPN2    | TIRAP    |
| ANGPTL5  | CNDP1   | FURIN    | KCNK18  | NOP16     | RPS15   | TJP2     |
| ANK2     | CNKSRI  | FUT1     | KCNK3   | NOS1      | RPS3    | TLDC2    |
| ANK3     | CNNM2   | FUT2     | KCNK6   | NOS1AP    | RPS6KB1 | TLK1     |
| ANKK1    | CNOT4   | FUT3     | KCNK9   | NOS2      | RPS6KL1 | TLL1     |
| ANKRD1   | CNPY3   | FUT6     | KCNMB3  | NOS3      | RPTOR   | TLR1     |
| ANKRD26  | CNR1    | FUZ      | KCNMB4  | NPAS2     | RRH     | TLR10    |
| ANKS1A   | CNR2    | FXYD6    | KCNN2   | NPAS3     | RRM1    | TLR2     |



|          |          |         |          |        |         |           |
|----------|----------|---------|----------|--------|---------|-----------|
| ANKS1B   | CNTF     | FZD1    | KCNQ2    | NPAT   | RRP1B   | TLR3      |
| ANKS6    | CNTN4    | FZD3    | KCNQ4    | NPC1L1 | RSC1A1  | TLR4      |
| ANO3     | CNTNAP2  | FZD6    | KCNS1    | NPFFR2 | RSPO1   | TLR5      |
| ANO5     | CNTNAP4  | FZD9    | KCNS3    | NPHS1  | RSPO4   | TLR6      |
| ANO6     | CNTNAP5  | G6PC    | KCNT1    | NPHS2  | RTN2    | TLR7      |
| ANO7     | COA5     | G6PC2   | KCNV1    | NPL    | RTN4R   | TLR8      |
| ANTXR2   | COCH     | G6PC3   | KCTD13   | NPPB   | RUNX1   | TLR9      |
| ANXA11   | COG2     | G6PD    | KDM3A    | NPPC   | RUNX3   | TLX1      |
| ANXA5    | COG3     | GAB2    | KDM4C    | NPR1   | RUVBL1  | TLX2      |
| AOAH     | COG7     | GABRA6  | KDM5A    | NPR2   | RXFP2   | TLX3      |
| AOC1     | COL10A1  | GABRG1  | KDR      | NPR3   | RXRA    | TM4SF19   |
| APAF1    | COL6A4P2 | GABRG3  | KEL      | NPSR1  | RXRG    | TMC1      |
| APBA2    | COL6A5   | GABRR2  | KHDC3L   | NPTN   | RYK     | TMC6      |
| APBB1    | COMMD1   | GAD2    | KHK      | NPY    | RYR3    | TMC8      |
| APBB2    | COMP     | GADD45A | KIAA0100 | NPY1R  | S100B   | TMEM114   |
| APBB3    | COQ4     | GADD45B | KIAA0232 | NPY2R  | S1PR1   | TMEM135   |
| APCDD1   | COQ9     | GAK     | KIAA0319 | NQO1   | SAA1    | TMEM165   |
| APH1A    | CORO1A   | GAL3ST1 | KIAA0513 | NQO2   | SAA2    | TMEM173   |
| APH1B    | COX4I1   | GAL3ST2 | KIAA1257 | NR0B1  | SAGE1   | TMEM185A  |
| APLNR    | COX4I2   | GAL3ST3 | KIAA1462 | NR0B2  | SARS2   | TMEM187   |
| APOA4    | COX7A2   | GAL3ST4 | KIAA2022 | NR1H2  | SART1   | TMEM2     |
| APOA5    | CPA4     | GALNT11 | KIF17    | NR1H3  | SART3   | TMEM249   |
| APOBEC1  | CPA6     | GALNT12 | KIF18A   | NR1H4  | SAT1    | TMEM39A   |
| APOBEC3B | CPB2     | GALNT13 | KIF1BP   | NR1I2  | SATL1   | TMEM52B   |
| APOBEC3G | CPE      | GALNT14 | KIF22    | NR1I3  | SBNO1   | TMEM8A    |
| APOBEC3H | CPLX2    | GALNT18 | KIF27    | NR2E1  | SCAP    | TMEM9     |
| APOC1    | CPN1     | GALNT5  | KIF5B    | NR2F2  | SCARB1  | TMEM99    |
| APOC3    | CPOX     | GALNT6  | KIF6     | NR3C1  | SCARB2  | TMIE      |
| APOD     | CPS1     | GALNT7  | KIFAP3   | NR3C2  | SCG2    | TMLHE     |
| APOH     | CPT1A    | GALNT8  | KIR2DL1  | NR4A1  | SCG3    | TMPO      |
| APOL1    | CPT1B    | GALNT9  | KIR2DL3  | NR4A2  | SCGB1A1 | TMPRSS11A |
| APOL3    | CPZ      | GALNTL5 | KIR2DL4  | NR4A3  | SCGB1D2 | TMPRSS15  |
| APRT     | CR1      | GALNTL6 | KIR3DL1  | NR5A1  | SCGB3A2 | TMPRSS3   |
| AQP1     | CREB1    | GALP    | KIR3DL2  | NRCAM  | SCLT1   | TMPRSS4   |
| AQP2     | CREB3L3  | GAMT    | KIRREL3  | NRG1   | SCN10A  | TMPRSS5   |
| AQP3     | CRELD1   | GAP43   | KL       | NRG3   | SCN11A  | TMPRSS6   |
| AQP4     | CRH      | GARS    | KLB      | NRIP1  | SCN2B   | TNC       |
| AQP5     | CRHR1    | GAS1    | KLC1     | NRP2   | SCN3B   | TNFAIP2   |

|          |          |        |          |        |           |           |
|----------|----------|--------|----------|--------|-----------|-----------|
| AQP7     | CRISP2   | GAS6   | KLF10    | NRTN   | SCN4B     | TNFRSF10A |
| AR       | CRK      | GATAD1 | KLF5     | NRXN2  | SCN7A     | TNFRSF10B |
| AREL1    | CRKL     | GATM   | KLF6     | NRXN3  | SCNN1A    | TNFRSF1B  |
| ARFGEF2  | CRP      | GBA3   | KLF7     | NSUN7  | SCNN1B    | TNFRSF25  |
| ARG1     | CRYM     | GBE1   | KLF8     | NT5C1B | SCNN1G    | TNFRSF4   |
| ARHGAP24 | CSDE1    | GBGT1  | KLHDC8B  | NT5C3A | SCO1      | TNFRSF9   |
| ARHGAP26 | CSF1     | GC     | KLHL10   | NT5E   | SCRIB     | TNFSF10   |
| ARHGAP45 | CSF2     | GCGR   | KLHL3    | NTF3   | SCUBE2    | TNFSF13B  |
| ARHGAP6  | CSF2RB   | GCKR   | KLHL9    | NTNG1  | SDC3      | TNFSF14   |
| ARHGAP9  | CSF3R    | GCLC   | KLK1     | NTRK3  | SEC63     | TNFSF15   |
| ARHGEF10 | CSH1     | GCLM   | KLK12    | NUAK1  | SECISBP2  | TNFSF8    |
| ARHGEF11 | CSMD1    | GCM2   | KLK15    | NUDC   | SEL1L     | TNKS      |
| ARHGEF12 | CSMD3    | GCNT1  | KLK3     | NUDT1  | SELE      | TNNI2     |
| ARHGEF6  | CSNK1A1L | GCSH   | KLK4     | NUDT6  | SELL      | TNNT1     |
| ARHGEF7  | CSNK1D   | GDAP1  | KLK7     | NUMA1  | SELP      | TNNT3     |
| ARHGEF9  | CSNK2A2  | GDF15  | KLKB1    | NUMBL  | SELPLG    | TNP1      |
| ARID4A   | CSNK2A3  | GDF9   | KMT5A    | NUP155 | SEM1      | TNR       |
| ARID4B   | CSRP3    | GDI1   | KMT5B    | NUP214 | SEMA4C    | TNS2      |
| ARL11    | CSTB     | GEMIN2 | KNG1     | NXF3   | SEMA4G    | TNS3      |
| ARL14EP  | CTF1     | GFAP   | KPNA1    | NXF5   | SEMA6D    | TNXA      |
| ARL6IP5  | CTGF     | GF11   | KRT13    | NXNL1  | SEMA7A    | TOMM40    |
| ARMS2    | CTH      | GF11B  | KRT16    | OAS1   | SEMG1     | TOMM40L   |
| ARPC3    | CTHRC1   | GFPT2  | KRT17    | OAS2   | SEPT12    | TOP1      |
| ARSE     | CTNNA2   | GFRA1  | KRT18    | OAZ1   | SEPT9     | TOP1MT    |
| ARSF     | CTNNA3   | GFRA2  | KRT2     | OBSCN  | SERPINA1  | TOP2A     |
| ART4     | CTNND2   | GGH    | KRT31    | OBSL1  | SERPINA10 | TOPBP1    |
| ARVCF    | CTRC     | GGT5   | KRT37    | OGG1   | SERPINA3  | TOX3      |
| AS3MT    | CTSB     | GH1    | KRT38    | OLFM2  | SERPINA6  | TP53AIP1  |
| ASAH2    | CTSC     | GH2    | KRT4     | OLIG2  | SERPINA7  | TP53BP1   |
| ASCC1    | CTSG     | GHRH   | KRT6A    | OLR1   | SERPINB11 | TP53I3    |
| ASCC3    | CTSZ     | GHRHR  | KRT6B    | OPCML  | SERPINB3  | TP73      |
| ASIP     | CTTNBP2  | GHRL   | KRT6C    | OPLAH  | SERPINB5  | TPCN2     |
| ASL      | CUBN     | GHSR   | KRT75    | OPN4   | SERPINB6  | TPH1      |
| ASPRV1   | CUL2     | GIF    | KRT8     | OPRD1  | SERPIND1  | TPH2      |
| ASS1     | CUL3     | GIMAP8 | KRT85    | OPRK1  | SERPINE1  | TPK1      |
| ASTN2    | CUL4B    | GIP    | KRT9     | OPRL1  | SERPINF1  | TPMT      |
| ATF1     | CUL5     | GIPC3  | KRTAP1-1 | OPRM1  | SERPINF2  | TPO       |
| ATF3     | CUL7     | GIPR   | KRTCAP3  | OPTC   | SERPINI2  | TPP2      |

|          |         |          |         |          |          |          |
|----------|---------|----------|---------|----------|----------|----------|
| ATG16L1  | CX3CR1  | GIT1     | KYNU    | OR10X1   | SERTAD1  | TPRN     |
| ATG7     | CXCL12  | GJA4     | L3MBTL1 | OR13G1   | SESN2    | TPTE     |
| ATL1     | CXCL16  | GJC3     | LAMA4   | OR1B1    | SETDB2   | TRADD    |
| ATP10A   | CXCL5   | GJD2     | LAMA5   | OR51G1   | SEZ6     | TRAF3    |
| ATP10D   | CXCR1   | GLCCI1   | LAMC1   | OR52H1   | SEZ6L2   | TRAF6    |
| ATP13A4  | CXCR3   | GLDC     | LAMTOR2 | OR52N4   | SFTPA1   | TRAK2    |
| ATP1B1   | CXCR4   | GLMN     | LARGE2  | OR5AC2   | SFTPA2   | TRAPPC10 |
| ATP2A1   | CYB5R4  | GLO1     | LBP     | OR5H6    | SFTPB    | TREH     |
| ATP2A2   | CYBRD1  | GLP1R    | LCE3B   | OR8K3    | SFTPC    | TRERF1   |
| ATP2A3   | CYCS    | GLRA1    | LCK     | ORC4     | SFTPD    | TRHR     |
| ATP2B4   | CYFIP1  | GLS      | LCN10   | ORC6     | SGCA     | TRIB1    |
| ATP2C1   | CYLD    | GLTSCR1  | LCT     | OTOA     | SGCB     | TRIB2    |
| ATP5E    | CYP11A1 | GLUD1    | LDB1    | OTOF     | SGCD     | TRIB3    |
| ATP5SL   | CYP11B1 | GLUD2    | LDB3    | OTOG     | SGCE     | TRIL     |
| ATP6AP2  | CYP11B2 | GLUL     | LDHA    | OTOGL    | SGCG     | TRIM17   |
| ATP6V0A1 | CYP17A1 | GLYCTK   | LDHB    | OTOR     | SGK1     | TRIM21   |
| ATP6V0A4 | CYP19A1 | GMIP     | LDLRAD2 | OVCH2    | SGSH     | TRIM22   |
| ATP6V1B1 | CYP1A1  | GMPS     | LDLRAD4 | OVGP1    | SH2B1    | TRIM24   |
| ATP7A    | CYP1A2  | GNA14    | LECT2   | OXCT1    | SH2D1A   | TRIM33   |
| ATP8B1   | CYP21A2 | GNAI2    | LEF1    | OXTR     | SH3GL1   | TRIM5    |
| ATPAF2   | CYP26A1 | GNAS-AS1 | LEFTY2  | P2RX1    | SHANK2   | TRIOBP   |
| ATRIP    | CYP26B1 | GNB1L    | LEP     | P2RX4    | SHBG     | TRMU     |
| ATRNL1   | CYP26C1 | GNS      | LEPR    | P2RX5    | SHMT1    | TROAP    |
| ATXN3L   | CYP27B1 | GOLGA3   | LFNG    | P2RX7    | SHOX2    | TROVE2   |
| AURKA    | CYP2A13 | GOLGA5   | LGALS13 | P2RY12   | SHROOM3  | TRPA1    |
| AURKC    | CYP2A6  | GON4L    | LGALS2  | P2RY4    | SI       | TRPC3    |
| AVPR1A   | CYP2B6  | GOPC     | LGALS3  | PABPC4L  | SIAE     | TRPC4    |
| AVPR1B   | CYP2C18 | GOSR2    | LGI1    | PACRG    | SIGLEC12 | TRPC5    |
| AVPR2    | CYP2C19 | GOT1     | LGR5    | PADI4    | SIGLEC14 | TRPC6    |
| AXIN1    | CYP2C8  | GP2      | LHB     | PAFAH1B3 | SIGLEC16 | TRPM2    |
| AXIN2    | CYP2C9  | GP6      | LHCGR   | PAK3     | SIK2     | TRPM3    |
| AXL      | CYP2D6  | GP9      | LHFPL5  | PALLD    | SIM1     | TRPM4    |
| AZIN2    | CYP2E1  | GPAM     | LHX1    | PAPD7    | SIM2     | TRPM6    |
| B2M      | CYP2F1  | GPATCH8  | LHX8    | PAPSS2   | SIPA1    | TRPM7    |
| B3GALNT1 | CYP2G1P | GPBAR1   | LIAS    | PARD3B   | SIPA1L1  | TRPS1    |
| B3GALT1  | CYP2J2  | GPC6     | LIF     | PARK2    | SIRT1    | TRPV1    |
| B3GALT2  | CYP2R1  | GPD1     | LIG1    | PARL     | SIRT3    | TRPV5    |
| B3GALT5  | CYP2U1  | GPD1L    | LIG3    | PARP1    | SIRT5    | TSG101   |

|          |         |        |              |         |            |         |
|----------|---------|--------|--------------|---------|------------|---------|
| B3GAT1   | CYP2W1  | GPD2   | LIMK1        | PARP2   | SIX2       | TSHB    |
| B3GAT2   | CYP3A4  | GPHN   | LIN28A       | PASK    | SLA        | TSHZ1   |
| B3GNT2   | CYP3A43 | GPI    | LIN28B       | PAWR    | SLBP       | TSLP    |
| B3GNT3   | CYP3A5  | GPNMB  | LIPA         | PAX5    | SLC10A1    | TSPAN17 |
| B3GNT6   | CYP3A7  | GPR1   | LIPC         | PAX8    | SLC10A2    | TSPAN7  |
| B3GNT7   | CYP46A1 | GPR12  | LIPE         | PAX9    | SLC11A1    | TSPEAR  |
| B4GALNT2 | CYP4A11 | GPR132 | LIPG         | PC      | SLC11A2    | TSPO    |
| B4GALNT3 | CYP4A22 | GPR139 | LIPI         | PCBD1   | SLC12A1    | TSSC4   |
| B4GALNT4 | CYP4B1  | GPR33  | LIPN         | PCCA    | SLC13A2    | TSSK4   |
| B4GALT1  | CYP4F12 | GPR55  | LITAF        | PCCB    | SLC14A1    | TTC14   |
| B4GALT2  | CYP4F2  | GPR68  | LLGL1        | PCDH11X | SLC14A2    | TTLL1   |
| B4GALT3  | CYP4F22 | GPS1   | LMAN1        | PCDH18  | SLC15A1    | TTLL11  |
| B4GALT4  | CYP4F3  | GPSM2  | LMBRD1       | PCDH19  | SLC16A1    | TUBA1A  |
| B4GALT5  | CYP7A1  | GPX1   | LMF1         | PCDH9   | SLC16A3    | TUBA8   |
| B4GALT6  | CYS1    | GPX4   | LMNB2        | PCDHA1  | SLC17A1    | TUBB1   |
| BAALC    | CYSLTR1 | GRB10  | LMO2         | PCDHA9  | SLC17A3    | TUBGCP5 |
| BAAT     | CYSLTR2 | GREM1  | LMO4         | PCDHAC1 | SLC17A8    | TULP3   |
| BACE1    | D2HGDH  | GRHL1  | LMTK3        | PCDHB4  | SLC18A1    | TXNIP   |
| BAG3     | DAD1    | GRHPR  | LNX1         | PCK2    | SLC19A1    | TXNRD2  |
| BANK1    | DAO     | GRID1  | LNX2         | PCM1    | SLC1A1     | TYK2    |
| BARD1    | DAOA    | GRIK1  | LOC100996842 | PCMT1   | SLC1A5     | TYMS    |
| BARX2    | DAPK1   | GRIK3  | LOR          | PCOLCE  | SLC22A1    | TYMSOS  |
| BAX      | DAZL    | GRIK4  | LOXHD1       | PCSK1   | SLC22A11   | TYRO3   |
| BAZ1B    | DBI     | GRIN3A | LOXL2        | PCSK2   | SLC22A12   | UACA    |
| BCAM     | DBT     | GRK3   | LOXL3        | PCSK5   | SLC22A14   | UBA3    |
| BCAT1    | DCAF13  | GRK4   | LPA          | PDCD5   | SLC22A18   | UBAC2   |
| BCAT2    | DCAF17  | GRK5   | LPAR1        | PDE10A  | SLC22A18AS | UBE2B   |
| BCHE     | DCDC2   | GRM3   | LPIN1        | PDE11A  | SLC22A2    | UBE2I   |
| BCKDHA   | DCK     | GRM5   | LPIN2        | PDE12   | SLC22A3    | UBE2NL  |
| BCKDHB   | DCLK1   | GRM8   | LPIN3        | PDE4B   | SLC22A4    | UBE3C   |
| BCKDK    | DCLRE1C | GRPR   | LPP          | PDE7B   | SLC22A5    | UBN2    |
| BCL2     | DCP1B   | GRXCR1 | LRCH1        | PDE8B   | SLC22A6    | UBQLN2  |
| BCL2A1   | DCTD    | GSDMA  | LRFN5        | PDGFC   | SLC22A9    | UBR3    |
| BCL2L1   | DCXR    | GSDMB  | LRP6         | PDGFRA  | SLC23A1    | UBR7    |
| BCL2L11  | DDAH1   | GSE1   | LRP8         | PDGFRL  | SLC24A2    | UCP1    |
| BCL2L2   | DDHD1   | GSK3B  | LRRC6        | PDK1    | SLC25A12   | UCP2    |
| BCL6     | DDX20   | GSPT1  | LRRFIP2      | PDLIM3  | SLC25A3    | UCP3    |
| BCL9     | DDX25   | GSPT2  | LRSAM1       | PDLIM4  | SLC25A38   | UFD1L   |

|         |         |          |          |        |          |          |
|---------|---------|----------|----------|--------|----------|----------|
| BCO1    | DDX3Y   | GSTA1    | LRTOMT   | PDLIM5 | SLC25A39 | UGCG     |
| BDKRB2  | DDX5    | GSTA2    | LTBP1    | PDPK1  | SLC26A1  | UGGT1    |
| BDNF    | DDX53   | GSTA3    | LTBP3    | PEAR1  | SLC26A3  | UGGT2    |
| BEX4    | DEC1    | GSTK1    | LTBR     | PECAM1 | SLC26A4  | UGT1A10  |
| BHLHA9  | DECR1   | GSTM1    | LTF      | PECR   | SLC26A5  | UGT1A6   |
| BHLHE41 | DEF6    | GSTM3    | LTK      | PEMT   | SLC26A6  | UGT1A8   |
| BHMT    | DEFB1   | GSTM4    | LTN1     | PENK   | SLC26A9  | UGT2A1   |
| BICC1   | DEFB126 | GSTO1    | LUM      | PER1   | SLC27A4  | UGT2A2   |
| BICD1   | DEFB4A  | GSTO2    | LY96     | PER2   | SLC27A5  | UGT2B15  |
| BIRC5   | DENND4A | GSTP1    | LYN      | PER3   | SLC28A1  | UGT2B17  |
| BLMH    | DES     | GSTT1    | LYZ      | PFAS   | SLC28A2  | UGT2B28  |
| BLVRA   | DFNA5   | GSTT2B   | LZTS1    | PFKM   | SLC28A3  | UGT2B4   |
| BLZF1   | DFNB59  | GSTZ1    | MACROD2  | PGAM1  | SLC29A1  | UGT2B7   |
| BMP10   | DGAT1   | GTF2E1   | MAD1L1   | PGAM2  | SLC29A2  | UGT8     |
| BMP15   | DGCR14  | GTF2H1   | MAD2L1   | PGAM5  | SLC29A4  | UHRF1BP1 |
| BMP2K   | DGCR5   | GTF2I    | MAGEE2   | PGBD1  | SLC2A2   | UIMC1    |
| BMP5    | DGKD    | GTF2IRD1 | MAGI2    | PGC    | SLC2A4   | ULK4     |
| BMP7    | DGKE    | GTF2IRD2 | MAGT1    | PGD    | SLC2A9   | UMOD     |
| BMPR1B  | DHFR    | GUCY2C   | MAML2    | PGM1   | SLC30A10 | UNC13D   |
| BMPR2   | DHH     | GUCY2F   | MAMLD1   | PGR    | SLC30A2  | UNC5C    |
| BOC     | DHRS4L1 | GYG1     | MAN1A2   | PGRMC1 | SLC30A5  | UNC5CL   |
| BPGM    | DHTKD1  | GYG2     | MAN2A1   | PHB    | SLC30A8  | UNC93A   |
| BPI     | DHX36   | GYPA     | MAOA     | PHEX   | SLC31A1  | UNC93B1  |
| BPIFA1  | DIABLO  | GYPB     | MAOB     | PHF11  | SLC34A1  | UNG      |
| BRAP    | DIAPH2  | GYPC     | MAP2     | PHF2   | SLC34A2  | UNKL     |
| BRCC3   | DIAPH3  | GYPE     | MAP2K3   | PHF3   | SLC34A3  | UPB1     |
| BRD1    | DIO1    | GYS1     | MAP2K4   | PHF8   | SLC35D1  | UPF3B    |
| BRD2    | DIO2    | GYS2     | MAP2K7   | PHKA1  | SLC35G2  | UPK3A    |
| BRSK2   | DIP2A   | GZMB     | MAP3K1   | PHKA2  | SLC44A2  | UQCRB    |
| BRWD1   | DIP2B   | H2BFWT   | MAP3K14  | PHKB   | SLC46A1  | UROD     |
| BRWD3   | DIP2C   | H6PD     | MAP3K15  | PHKG2  | SLC47A1  | USP1     |
| BSCL2   | DIRC2   | HABP2    | MAP3K8   | PHLPP2 | SLC47A2  | USP15    |
| BSG     | DISC1   | HAL      | MAP4K5   | PI3    | SLC4A1   | USP24    |
| BSND    | DISP1   | HAMP     | MAP6     | PICALM | SLC4A10  | USP26    |
| BST1    | DKK2    | HAND1    | MAP7D3   | PICK1  | SLC4A3   | USP46    |
| BTAF1   | DKK3    | HAND2    | MAPK10   | PIF1   | SLC4A7   | USP9Y    |
| BTBD9   | DLC1    | HAPLN1   | MAPK8IP1 | PIGM   | SLC52A1  | UST      |
| BTC     | DLEC1   | HARS2    | MARVELD2 | PIGR   | SLC5A1   | UTF1     |

|           |          |         |        |         |          |         |
|-----------|----------|---------|--------|---------|----------|---------|
| BTLA      | DLG5     | HAS1    | MASP2  | PIGZ    | SLC5A11  | UTP4    |
| BTN1A1    | DLGAP2   | HAVCR1  | MAST4  | PIK3C2G | SLC5A2   | UTRN    |
| BTN2A1    | DLGAP3   | HAX1    | MASTL  | PIK3C3  | SLC5A5   | UTS2    |
| BTRC      | DLL3     | HBD     | MAT1A  | PIK3CB  | SLC6A1   | UVSSA   |
| C10orf105 | DLX3     | HBE1    | MATN3  | PIK3CG  | SLC6A11  | VANGL1  |
| C10orf11  | DLX6     | HBEGF   | MATR3  | PIK3R4  | SLC6A12  | VAPB    |
| C12orf29  | DMBT1    | HBG2    | MAVS   | PIM1    | SLC6A13  | VCAM1   |
| C12orf65  | DMC1     | HBM     | MBD1   | PIN1    | SLC6A14  | VCL     |
| C15orf62  | DMD      | HBS1L   | MBD3   | PIP4K2A | SLC6A18  | VCX3A   |
| C16orf58  | DMGDH    | HBZ     | MBD4   | PIP5K1B | SLC6A2   | VDR     |
| C1GALT1   | DMP1     | HCFC1   | MBL2   | PIP5K1C | SLC6A4   | VEGFA   |
| C1GALT1C1 | DMRT1    | HCK     | MBNL1  | PITPNA  | SLC6A5   | VIP     |
| C1QA      | DMXL1    | HCLS1   | MC2R   | PIWIL3  | SLC6A6   | VIPAS39 |
| C1QB      | DNAJA4   | HCN2    | MC3R   | PKD1    | SLC7A1   | VIPR2   |
| C1QC      | DNAJB2   | HCN3    | MC4R   | PKD1L1  | SLC7A10  | VKORC1  |
| C1S       | DNAJB6   | HCN4    | MCC    | PKD2    | SLC7A11  | VNN1    |
| C21orf91  | DNASE1L1 | HCRTR1  | MCCC1  | PKHD1   | SLC7A2   | VPREB1  |
| C2orf42   | DNASE2   | HCRTR2  | MCCC2  | PKLR    | SLC7A5   | VPS33B  |
| C3        | DNMT3L   | HDAC9   | MCEE   | PKM     | SLC7A7   | VPS37A  |
| C3AR1     | DOC2A    | HDC     | MCF2L2 | PKN3    | SLC7A9   | VPS54   |
| C4BPA     | DOCK4    | HDLBP   | MCFD2  | PKP1    | SLC8A1   | VRK1    |
| C5        | DOCK9    | HDX     | MCHR1  | PLA2G2A | SLC9A3R1 | VSIG4   |
| C5AR2     | DOK1     | HELQ    | MCL1   | PLA2G2D | SLC9A9   | VTN     |
| C6        | DOK2     | HEPACAM | MCM4   | PLA2G4A | SLCO1A2  | VWF     |
| C7        | DOK5     | HEPH    | MCM6   | PLA2G4C | SLCO1B1  | WASF3   |
| C8A       | DOLK     | HES6    | MCM7   | PLA2G7  | SLCO1B3  | WDFY4   |
| C8B       | DOLPP1   | HES7    | MCM9   | PLAG1   | SLCO1C1  | WDR13   |
| C9        | DOT1L    | HEY1    | MCPH1  | PLAGL1  | SLCO2B1  | WDR3    |
| CA1       | DPCD     | HEY2    | MDH1   | PLAT    | SLCO5A1  | WDR62   |
| CA12      | DPP10    | HFE2    | MDM2   | PLAU    | SLFN5    | WDR72   |
| CA6       | DPY19L2  | HGF     | MDM4   | PLAUR   | SLIT3    | WISP3   |
| CABIN1    | DPYS     | HHEX    | MDN1   | PLCB1   | SLITRK1  | WNK4    |
| CABP2     | DPYSL2   | HHIP    | ME2    | PLCE1   | SLITRK5  | WNT4    |
| CACNA1C   | DRD1     | HIF1A   | MECOM  | PLCZ1   | SLURP1   | WNT5B   |
| CACNA2D1  | DRD2     | HIF1AN  | MED17  | PLD2    | SMAD1    | WNT7A   |
| CACNA2D3  | DRD3     | HINT1   | MEF2A  | PLEKHG4 | SMAD2    | WWC1    |
| CACNB2    | DRD4     | HIP1    | MEGF10 | PLEKHG5 | SMAD5    | WWTR1   |
| CACNG3    | DRD5     | HIST3H3 | MEGF11 | PLIN1   | SMAD6    | XBP1    |

|          |         |         |          |          |             |         |
|----------|---------|---------|----------|----------|-------------|---------|
| CACNG4   | DROSHA  | HK2     | MEIS1    | PLIN4    | SMAD7       | XDH     |
| CADM1    | DRP2    | HLX     | MEP1B    | PLOD2    | SMAD9       | XG      |
| CADPS2   | DSC3    | HMBS    | MEPE     | PLSCR3   | SMAP1       | XIAP    |
| CALCA    | DSCAM   | HMGA1   | MESDC2   | PLTP     | SMARCA2     | XIST    |
| CALCR    | DSCR8   | HMGCL   | MESP2    | PLXND1   | SMARCAD1    | XK      |
| CALCRL   | DSG1    | HMGCR   | MEST     | PMAIP1   | SMC1B       | XKR4    |
| CALHM1   | DSG3    | HMGCS2  | MET      | PML      | SMG1        | XPNPEP2 |
| CALM1    | DSPP    | HMMR    | METTL21A | PMS2P3   | SMG6        | XRCC3   |
| CALM3    | DTNA    | HMOX1   | MFAP4    | PNLIP    | SMIM3       | XRCC5   |
| CALR3    | DUOX2   | HMOX2   | MFGE8    | PNP      | SMN1        | XRCC6   |
| CALU     | DUOXA1  | HMSD    | MFSD2A   | PNPLA2   | SMN2        | YARS    |
| CAMK4    | DUSP23  | HMX2    | MGAT1    | PNPLA3   | SMNDC1      | YBX2    |
| CAMKK1   | DYM     | HNF1B   | MGAT3    | POF1B    | SMOC2       | YTHDF2  |
| CAMKK2   | DYNAP   | HNRNPH3 | MGAT4A   | POFUT2   | SMPD3       | YWHAE   |
| CAMKMT   | DYSF    | HOGA1   | MGAT4B   | POLB     | SMPX        | ZAN     |
| CAMP     | DYX1C1  | HOMER2  | MGAT4C   | POLE2    | SMUG1       | ZAP70   |
| CAMSAP2  | E2F1    | HOXA10  | MGAT5    | POLL     | SMYD3       | ZBTB25  |
| CAPN10   | E2F4    | HOXA11  | MGAT5B   | POLR2E   | SNAPC4      | ZBTB40  |
| CAPN13   | E2F5    | HOXA2   | MGEA5    | POLR2F   | SNAPC5      | ZBTB41  |
| CAPN3    | EBAG9   | HOXA3   | MGLL     | POLR3H   | SNCAIP      | ZC3H3   |
| CARD11   | ECE1    | HOXA4   | MGMT     | POLRMT   | SNCB        | ZC3HAV1 |
| CARD14   | ECE2    | HOXB6   | MGST2    | POMC     | SND1        | ZCCHC12 |
| CARD8    | ECI1    | HOXC13  | MGST3    | POMP     | SNORD116-10 | ZCCHC13 |
| CARD9    | ECM1    | HOXD10  | MIA3     | PON1     | SNORD50A    | ZCCHC8  |
| CARTPT   | ECSIT   | HOXD13  | MIAT     | PON2     | SNRK        | ZDHHC15 |
| CASC16   | EDA     | HOXD4   | MICAL1   | PON3     | SNTA1       | ZDHHC17 |
| CASP1    | EDA2R   | HP      | MIIP     | POP1     | SNTG2       | ZDHHC24 |
| CASP12   | EDAR    | HPD     | MINPP1   | POSTN    | SNX19       | ZDHHC6  |
| CASP2    | EDARADD | HPRT1   | MIPOL1   | POU4F3   | SNX3        | ZDHHC8  |
| CASP3    | EDN2    | HPSE2   | MIR146A  | POU5F1   | SOCS1       | ZFAT    |
| CASP5    | EEF1B2  | HR      | MIR17HG  | POU5F1B  | SOCS3       | ZFHX3   |
| CASP8    | EEF2K   | HRC     | MIR206   | PPARA    | SOD1        | ZFP36   |
| CASP9    | EEF2KMT | HRG     | MIR510   | PPARD    | SOD2        | ZFP36L1 |
| CAST     | EFCAB5  | HRH2    | MIR96    | PPARG    | SOD3        | ZFP36L2 |
| CAT      | EFHC2   | HRH3    | MKL1     | PPARGC1A | SOGA3       | ZFP69   |
| CATSPER1 | EFNA5   | HS1BP3  | MLC1     | PPARGC1B | SOHLH1      | ZFP90   |
| CATSPER2 | EFR3A   | HSD11B1 | MLLT10   | PPAT     | SORBS1      | ZFYVE27 |
| CATSPER3 | EFTUD2  | HSD17B1 | MLLT3    | PPIA     | SORCS1      | ZHX3    |

|          |        |          |          |          |           |         |
|----------|--------|----------|----------|----------|-----------|---------|
| CATSPER4 | EGF    | HSD17B2  | MLYCD    | PPIG     | SORL1     | ZIC4    |
| CAV3     | EGLN1  | HSD17B3  | MMAA     | PPM1B    | SORT1     | ZMYM3   |
| CBFB     | EGR3   | HSD3B1   | MMAB     | PPM1G    | SOX17     | ZNF175  |
| CBLB     | EHBP1  | HSD3B2   | MMEL1    | PPM1K    | SOX18     | ZNF202  |
| CBR1     | EHD2   | HSF1     | MMP10    | PPOX     | SOX7      | ZNF213  |
| CBR3     | EHHADH | HSP90AA1 | MMP12    | PPP1R1A  | SP100     | ZNF224  |
| CBX2     | EIF3H  | HSP90B1  | MMP13    | PPP1R3A  | SP110     | ZNF24   |
| CBX4     | EIF4E  | HSPA5    | MMP20    | PPP1R3C  | SP7       | ZNF300  |
| CBY1     | EIF4H  | HSPA8    | MMP3     | PPP2R1B  | SP8       | ZNF350  |
| CCDC107  | ELAC2  | HSPA9    | MMP7     | PPP2R2C  | SPAG16    | ZNF385B |
| CCDC12   | ELANE  | HSPB1    | MMP8     | PPP3R1   | SPAG17    | ZNF41   |
| CCDC127  | ELAVL2 | HSPB3    | MMP9     | PRB1     | SPAG8     | ZNF419  |
| CCDC14   | ELF4   | HSPB7    | MNX1     | PRB3     | SPANXN5   | ZNF420  |
| CCDC170  | ELK1   | HSPB8    | MOCOS    | PRB4     | SPATA13   | ZNF433  |
| CCDC50   | ELK3   | HTN3     | MOK      | PRCC     | SPATA16   | ZNF480  |
| CCDC66   | ELMOD2 | HTR1A    | MPG      | PRCP     | SPATA21   | ZNF507  |
| CCDC78   | ELP2   | HTR1B    | MPHOSPH8 | PRDM2    | SPATA31C1 | ZNF526  |
| CCDC8    | EME1   | HTR2A    | MPI      | PRDM9    | SPECC1    | ZNF592  |
| CCK      | EMG1   | HTR2B    | MPO      | PRG4     | SPG20     | ZNF627  |
| CCKAR    | EMX1   | HTR2C    | MPP3     | PRH1     | SPG21     | ZNF674  |
| CCKBR    | EMX2   | HTR3A    | MPP4     | PRICKLE1 | SPI1      | ZNF711  |
| CCL11    | EN2    | HTR3B    | MPP6     | PRICKLE2 | SPINK1    | ZNF75D  |
| CCL17    | ENAM   | HTR3C    | MPP7     | PRKAA2   | SPINK5    | ZNF80   |
| CCL2     | ENO1   | HTR3E    | MPST     | PRKACA   | SPP1      | ZNF804A |
| CCL22    | ENO3   | HTR5A    | MR1      | PRKAG3   | SPRED2    | ZNF81   |
| CCL26    | ENSA   | HTR6     | MRAP     | PRKAR1B  | SPRN      | ZNHIT6  |
| CCL3     | ENTPD5 | HTR7     | MRC1     | PRKCA    | SPRR3     | ZNRF1   |
| CCL5     | EOMES  | HVCN1    | MREG     | PRKCB    | SPRY2     | ZPBP    |
| CCL7     | EPB41  | IAPP     | MRPL3    | PRKCH    | SPTA1     | ZPBP2   |
| CCNA2    | EPB42  | IBSP     | MRPL48   | PRKCSH   | SPTAN1    |         |
| CCNH     | EPC2   | ICAM1    | MRPS22   | PRKD3    | SPTB      |         |
| CCPG1    | EPHA3  | ICAM4    | MRRF     | PRKRA    | SPTBN1    |         |
| CCR1     | EPHA5  | ICAM5    | MS4A1    | PRL      | SPTBN5    |         |
| CCR2     | EPHA7  | ICK      | MS4A12   | PRLH     | SPTLC1    |         |
| CCR3     | EPHB2  | ID3      | MS4A2    | PRLHR    | SPTLC2    |         |
| CCR5     | EPHB6  | ID4      | MS4A3    | PRLR     | SRD5A2    |         |
| CCR6     | EPHX1  | IDE      | MS4A6A   | PRM1     | SREBF2    |         |
| CCR7     | EPO    | IDH1     | MS4A6E   | PRM2     | SREK1     |         |



**Table S11.** List with 100 VUS pending on reclassification at the Genetics Department of the HU-FJD.

| ID                         | HGVSc                       | HGVSp                             | SYMBOL    | AC | AF       | AC_IRD | AF_IRD   | AC_PC | AF_PC    |
|----------------------------|-----------------------------|-----------------------------------|-----------|----|----------|--------|----------|-------|----------|
| chr1:94471103A>G           | NM_000350.3:c.6041T>C       | NP_000341.2:p.Met2014Thr          | ABCA4     | 1  | 8.80E-05 | 1      | 2.90E-04 | 0     | 0.00E+00 |
| chr1:94502731A>C           | NM_000350.3:c.3783T>G       | NP_000341.2:p.Ser1261Arg          | ABCA4     | 1  | 8.97E-05 | 1      | 2.90E-04 | 0     | 0.00E+00 |
| chr1:94506911G>C           | NM_000350.3:c.3376C>G       | NP_000341.2:p.Leu1126Val          | ABCA4     | 1  | 8.77E-05 | 1      | 2.80E-04 | 0     | 0.00E+00 |
| chr1:94526199G>A           | NM_000350.3:c.2054C>T       | NP_000341.2:p.Thr685Ile           | ABCA4     | 1  | 8.80E-05 | 1      | 2.80E-04 | 0     | 0.00E+00 |
| chr1:103352419G>T          | NM_001190709.1:c.4685C>A    | NP_001177638.1:p.Thr1562Asn       | COL11A1   | 6  | 5.33E-04 | 3      | 8.60E-04 | 2     | 2.86E-04 |
| chr1:103474020T>C          | NM_001190709.1:c.1565A>G    | NP_001177638.1:p.Gln522Arg        | COL11A1   | 1  | 8.98E-05 | 1      | 2.90E-04 | 0     | 0.00E+00 |
| chr1:150316692C>T          | NM_001350529.1:c.1076C>T    | NP_001337458.1:p.Thr359Met        | PRPF3     | 2  | 1.81E-04 | 2      | 5.90E-04 | 0     | 0.00E+00 |
| chr1:186120331G>A          | NM_031935.3:c.14609-1G>A    | NA                                | HMCN1     | 1  | 8.97E-05 | 1      | 2.90E-04 | 0     | 0.00E+00 |
| chr1:197297911T>G          | NM_001193640.2:c.430T>G     | NP_001180569.1:p.Phe144Val        | CRB1      | 14 | 1.26E-03 | 7      | 2.05E-03 | 5     | 7.26E-04 |
| chr1:197297973GGATGGAATT>G | NM_001193640.2:c.498_506del | NP_001180569.1:p.Ile167_Gly169del | CRB1      | 37 | 3.25E-03 | 22     | 6.24E-03 | 14    | 1.99E-03 |
| chr1:197298095T>C          | NM_001193640.2:c.614T>C     | NP_001180569.1:p.Ile205Thr        | CRB1      | 38 | 3.33E-03 | 15     | 4.25E-03 | 23    | 3.26E-03 |
| chr1:202910771T>C          | NM_001290553.1:c.1058A>G    | NP_001277482.1:p.Tyr353Cys        | ADIPOR1   | 1  | 9.03E-05 | 1      | 2.90E-04 | 0     | 0.00E+00 |
| chr1:215799146T>G          | NA                          | NA                                | KCTD3     | 1  | 9.03E-05 | 1      | 2.90E-04 | 0     | 0.00E+00 |
| chr1:215848154C>T          | NM_206933.3:c.13099G>A      | NP_996816.2:p.Val4367Ile          | USH2A     | 1  | 8.77E-05 | 1      | 2.80E-04 | 0     | 0.00E+00 |
| chr1:215848921G>A          | NM_206933.3:c.12332C>T      | NP_996816.2:p.Ser4111Phe          | USH2A     | 1  | 8.77E-05 | 1      | 2.80E-04 | 0     | 0.00E+00 |
| chr1:215960035C>A          | NM_206933.3:c.10364G>T      | NP_996816.2:p.Ser3455Ile          | USH2A     | 1  | 8.77E-05 | 1      | 2.80E-04 | 0     | 0.00E+00 |
| chr1:216246603C>T          | NM_206933.3:c.5612G>A       | NP_996816.2:p.Gly1871Asp          | USH2A     | 9  | 7.90E-04 | 2      | 5.70E-04 | 6     | 8.50E-04 |
| chr1:216256830C>T          | NM_206933.3:c.5266G>A       | NP_996816.2:p.Val1756Ile          | USH2A     | 1  | 8.82E-05 | 1      | 2.90E-04 | 0     | 0.00E+00 |
| chr1:216258156G>A          | NM_206933.3:c.5051C>T       | NP_996816.2:p.Pro1684Leu          | USH2A     | 1  | 8.77E-05 | 1      | 2.80E-04 | 0     | 0.00E+00 |
| chr1:216500940T>G          | NM_007123.5:c.841A>C        | NP_009054.5:p.Thr281Pro           | USH2A     | 2  | 1.77E-04 | 1      | 2.90E-04 | 1     | 1.43E-04 |
| chr10:73498276G>A          | NA                          | NA                                | C10orf105 | 3  | 2.63E-04 | 2      | 5.70E-04 | 1     | 1.42E-04 |
| chr10:85961599G>A          | NM_001171971.3:c.562G>A     | NP_001165442.1:p.Gly188Ser        | CDHR1     | 1  | 8.88E-05 | 1      | 2.90E-04 | 0     | 0.00E+00 |
| chr10:85971932C>A          | NM_001171971.3:c.1554-3C>A  | NA                                | CDHR1     | 5  | 4.40E-04 | 2      | 5.70E-04 | 3     | 4.26E-04 |
| chr10:85971970C>G          | NM_001171971.3:c.1589C>G    | NP_001165442.1:p.Thr530Ser        | CDHR1     | 4  | 3.57E-04 | 3      | 8.70E-04 | 1     | 1.44E-04 |
| chr10:102780410T>C         | NM_001195263.2:c.893A>G     | NP_001182192.1:p.Lys298Arg        | PDZD7     | 1  | 8.93E-05 | 1      | 2.90E-04 | 0     | 0.00E+00 |
| chr11:61725731C>G          | NM_001139443.2:c.648C>G     | NP_001132915.1:p.Phe216Leu        | BEST1     | 1  | 8.84E-05 | 1      | 2.90E-04 | 0     | 0.00E+00 |
| chr12:88448181G>A          | NA                          | NA                                | C12orf29  | 1  | 8.98E-05 | 1      | 2.90E-04 | 0     | 0.00E+00 |

|                                   |                                   |                                       |         |    |          |   |          |    |          |
|-----------------------------------|-----------------------------------|---------------------------------------|---------|----|----------|---|----------|----|----------|
| chr12:8848<br>1670G>C             | NM_025114.4:<br>c.4081C>G         | NP_079390.3:<br>p.Leu1361Val          | CEP290  | 1  | 8.85E-05 | 1 | 2.90E-04 | 0  | 0.00E+00 |
| chr12:8853<br>5042G>T             | NA                                | NA                                    | TMTC3   | 1  | 8.89E-05 | 1 | 2.90E-04 | 0  | 0.00E+00 |
| chr14:6819<br>6055C>G             | NM_152443.3:<br>c.806C>G          | NP_689656.2:<br>p.Ala269Gly           | RDH12   | 1  | 8.79E-05 | 1 | 2.80E-04 | 0  | 0.00E+00 |
| chr14:8889<br>2973G>A             | NM_001040428.3:<br>c.674G>A       | NP_001035518.1:<br>p.Arg225His        | SPATA7  | 3  | 2.69E-04 | 1 | 2.90E-04 | 2  | 2.88E-04 |
| chr16:5792<br>1818G>A             | NM_001286130.2:<br>c.3385C>T      | NP_001273059.1:<br>p.Arg1129Trp       | CNGB1   | 1  | 8.90E-05 | 1 | 2.90E-04 | 0  | 0.00E+00 |
| chr16:5797<br>3358C>G             | NM_001286130.2:<br>c.1330G>C      | NP_001273059.1:<br>p.Glu444Gln        | CNGB1   | 1  | 9.66E-05 | 1 | 3.30E-04 | 0  | 0.00E+00 |
| chr17:1554<br>979T>G              | NM_006445.4:<br>c.6473A>C         | NP_006436.3:<br>p.His2158Pro          | PRPF8   | 1  | 8.87E-05 | 1 | 2.90E-04 | 0  | 0.00E+00 |
| chr17:1558<br>750T>C              | NM_006445.4:<br>c.5881A>G         | NP_006436.3:<br>p.Ile1961Val          | PRPF8   | 1  | 9.02E-05 | 1 | 2.90E-04 | 0  | 0.00E+00 |
| chr17:6328<br>998C>A              | NM_001033054.3:<br>c.748G>T       | NP_001028226.1:<br>p.Ala250Ser        | AIPL1   | 18 | 1.62E-03 | 6 | 1.75E-03 | 12 | 1.74E-03 |
| chr17:6337<br>375G>C              | NM_001033054.3:<br>c.140C>G       | NP_001028226.1:<br>p.Thr47Arg         | AIPL1   | 17 | 1.49E-03 | 6 | 1.70E-03 | 11 | 1.56E-03 |
| chr17:7906<br>552G>A              | NM_000180.4:<br>c.187G>A          | NP_000171.1:<br>p.Ala63Thr            | GUCY2D  | 1  | 8.89E-05 | 1 | 2.90E-04 | 0  | 0.00E+00 |
| chr17:7917<br>341G>C              | NM_000180.4:<br>c.2407G>C         | NP_000171.1:<br>p.Asp803His           | GUCY2D  | 1  | 9.00E-05 | 1 | 2.90E-04 | 0  | 0.00E+00 |
| chr17:7918<br>305T>C              | NM_000180.4:<br>c.2705T>C         | NP_000171.1:<br>p.Val902Ala           | GUCY2D  | 1  | 8.77E-05 | 1 | 2.80E-04 | 0  | 0.00E+00 |
| chr17:2687<br>9514G>A             | NM_001330166.2:<br>c.-252C>T      | NA                                    | UNC119  | 1  | 9.04E-05 | 1 | 2.90E-04 | 0  | 0.00E+00 |
| chr17:5823<br>4860T>C             | NM_000717.5:<br>c.341T>C          | NP_000708.1:<br>p.Leu114Ser           | CA4     | 10 | 9.01E-04 | 3 | 8.80E-04 | 6  | 8.70E-04 |
| chr17:7949<br>6011G>A             | NM_001077182.3:<br>c.454G>A       | NP_001070650.1:<br>p.Val152Met        | FSCN2   | 1  | 8.77E-05 | 0 | 0.00E+00 | 1  | 1.42E-04 |
| chr17:7950<br>3252TGAA<br>>T      | NM_001077182.3:<br>c.1071_1073del | NP_001070650.1:<br>p.Lys357del        | FSCN2   | 2  | 1.75E-04 | 0 | 0.00E+00 | 0  | 0.00E+00 |
| chr17:7950<br>3273C>T             | NM_001077182.3:<br>c.1085C>T      | NP_001070650.1:<br>p.Ala362Val        | FSCN2   | 1  | 8.77E-05 | 1 | 2.80E-04 | 0  | 0.00E+00 |
| chr19:3770<br>708C>T              | NM_001319074.2:<br>c.604G>A       | NP_001306003.1:<br>p.Ala202Thr        | RAX2    | 1  | 8.93E-05 | 1 | 2.90E-04 | 0  | 0.00E+00 |
| chr19:7621<br>417C>T              | NM_001166111.2:<br>c.3202C>T      | NP_001159583.1:<br>p.Arg1068Cys       | PNPLA6  | 2  | 1.75E-04 | 1 | 2.80E-04 | 1  | 1.42E-04 |
| chr19:5462<br>8040G>A             | NM_015629.4:<br>c.855+5G>A        | NA                                    | PRPF31  | 1  | 8.82E-05 | 1 | 2.80E-04 | 0  | 0.00E+00 |
| chr2:29296<br>025TGCTT<br>GCCCA>T | NM_001029883.3:<br>c.1094_1102del | NP_001025054.1:<br>p.Leu365_Lys367del | C2orf71 | 2  | 1.75E-04 | 2 | 5.70E-04 | 0  | 0.00E+00 |
| chr2:98986<br>517C>T              | NM_001079878.2:<br>c.79C>T        | NP_001073347.1:<br>p.Arg27Cys         | CNGA3   | 1  | 8.88E-05 | 1 | 2.90E-04 | 0  | 0.00E+00 |
| chr2:99012<br>444C>G              | NM_001079878.2:<br>c.757C>G       | NP_001073347.1:<br>p.Pro253Ala        | CNGA3   | 15 | 1.32E-03 | 5 | 1.42E-03 | 7  | 9.93E-04 |
| chr2:99012<br>834T>C              | NM_001079878.2:<br>c.1147T>C      | NP_001073347.1:<br>p.Ser383Pro        | CNGA3   | 2  | 1.75E-04 | 2 | 5.70E-04 | 0  | 0.00E+00 |
| chr2:99013<br>422G>A              | NM_001079878.2:<br>c.1735G>A      | NP_001073347.1:<br>p.Ala579Thr        | CNGA3   | 2  | 1.75E-04 | 1 | 2.80E-04 | 1  | 1.42E-04 |
| chr2:112740<br>548T>A             | NM_006334.3:<br>c.1274T>A         | NP_006334.2:<br>p.Val425Glu           | MERTK   | 1  | 8.78E-05 | 1 | 2.80E-04 | 0  | 0.00E+00 |
| chr2:112779<br>018G>A             | NM_006334.3:<br>c.2209G>A         | NP_006334.2:<br>p.Val737Ile           | MERTK   | 1  | 8.77E-05 | 1 | 2.80E-04 | 0  | 0.00E+00 |
| chr2:112779<br>920A>G             | NM_006334.3:<br>c.2435A>G         | NP_006334.2:<br>p.Tyr812Cys           | MERTK   | 3  | 2.63E-04 | 2 | 5.70E-04 | 1  | 1.42E-04 |

|                                             |                                |                                    |        |    |          |    |          |    |          |
|---------------------------------------------|--------------------------------|------------------------------------|--------|----|----------|----|----------|----|----------|
| chr2:18240<br>9512C>T                       | NM_001030311.2:<br>c.1358G>A   | NP_001025482.1:<br>p.Gly453Glu     | CERKL  | 1  | 8.87E-05 | 0  | 0.00E+00 | 1  | 1.43E-04 |
| chr2:23421<br>7866G>A                       | NM_000541.5:<br>c.31G>A        | NP_000532.2:<br>p.Glu11Lys         | SAG    | 20 | 1.80E-03 | 4  | 1.17E-03 | 14 | 2.03E-03 |
| chr20:3891<br>453A>T                        | NM_001324191.2:<br>c.338A>T    | NP_001311120.1:<br>p.Asn113Ile     | PANK2  | 4  | 3.60E-04 | 3  | 8.70E-04 | 1  | 1.45E-04 |
| chr3:50231<br>006C>A                        | NM_000172.4:<br>c.359C>A       | NP_000163.2:<br>p.Ser120Ter        | GNAT1  | 7  | 6.14E-04 | 2  | 5.70E-04 | 5  | 7.08E-04 |
| chr3:10096<br>2441ACAT><br>A                | NM_016247.4:<br>c.2731_2733del | NP_057331.2:<br>p.Met911del        | IMPG2  | 1  | 9.32E-05 | 1  | 3.00E-04 | 0  | 0.00E+00 |
| chr3:10096<br>4729T>A                       | NM_016247.4:<br>c.1460A>T      | NP_057331.2:<br>p.His487Leu        | IMPG2  | 2  | 1.75E-04 | 2  | 5.70E-04 | 0  | 0.00E+00 |
| chr3:10096<br>4889G>A                       | NM_016247.4:<br>c.1300C>T      | NP_057331.2:<br>p.Pro434Ser        | IMPG2  | 11 | 9.74E-04 | 5  | 1.43E-03 | 5  | 7.16E-04 |
| chr3:19336<br>6624A>T                       | NM_001354663.2:<br>c.1442A>T   | NP_001341592.1:<br>p.Glu481Val     | OPA1   | 1  | 9.03E-05 | 1  | 2.90E-04 | 0  | 0.00E+00 |
| chr4:61968<br>7G>T                          | NM_000283.3:<br>c.272G>T       | NP_000274.2:<br>p.Arg91Leu         | PDE6B  | 1  | 8.89E-05 | 0  | 0.00E+00 | 0  | 0.00E+00 |
| chr4:62929<br>35G>A                         | NM_001145853.1:<br>c.472G>A    | NP_001139325.1:<br>p.Glu158Lys     | WFS1   | 1  | 8.82E-05 | 1  | 2.80E-04 | 0  | 0.00E+00 |
| chr4:630311<br>9C>T                         | NM_001145853.1:<br>c.1597C>T   | NP_001139325.1:<br>p.Pro533Ser     | WFS1   | 6  | 5.26E-04 | 4  | 1.13E-03 | 0  | 0.00E+00 |
| chr4:16026<br>888C>T                        | NM_001145847.2:<br>c.530G>A    | NP_001139319.1:<br>p.Arg177Gln     | PROM1  | 1  | 8.97E-05 | 1  | 2.90E-04 | 0  | 0.00E+00 |
| chr6:42141<br>500C>T                        | NM_000409.4:<br>c.149C>T       | NP_000400.2:<br>p.Pro50Leu         | GUCA1A | 37 | 3.30E-03 | 10 | 2.90E-03 | 24 | 3.45E-03 |
| chr6:42147<br>099A>AGA<br>CGAGGAG<br>GGGGCT | NM_000409.4:<br>c.572_586dup   | NP_000400.2:<br>p.Glu191_Glu195dup | GUCA1A | 1  | 9.03E-05 | 1  | 2.90E-04 | 0  | 0.00E+00 |
| chr6:42672<br>150G>A                        | NM_000322.5:<br>c.781C>T       | NP_000313.2:<br>p.Leu261Phe        | PRPH2  | 1  | 8.77E-05 | 1  | 2.80E-04 | 0  | 0.00E+00 |
| chr6:42672<br>265GCAGG<br>GC>G              | NM_000322.5:<br>c.660_665del   | NP_000313.2:<br>p.Pro221_Cys222del | PRPH2  | 2  | 1.75E-04 | 2  | 5.70E-04 | 0  | 0.00E+00 |
| chr6:42689<br>961C>T                        | NM_000322.5:<br>c.112G>A       | NP_000313.2:<br>p.Gly38Arg         | PRPH2  | 1  | 8.77E-05 | 1  | 2.80E-04 | 0  | 0.00E+00 |
| chr6:65303<br>156G>A                        | NM_001142800.2:<br>c.3731C>T   | NP_001136272.1:<br>p.Thr1244Ile    | EYS    | 2  | 1.75E-04 | 2  | 5.70E-04 | 0  | 0.00E+00 |
| chr6:66205<br>150C>G                        | NM_001142800.2:<br>c.154G>C    | NP_001136272.1:<br>p.Asp52His      | EYS    | 1  | 8.93E-05 | 1  | 2.90E-04 | 0  | 0.00E+00 |
| chr6:66205<br>279G>T                        | NM_001142800.2:<br>c.25C>A     | NP_001136272.1:<br>p.Leu9Met       | EYS    | 1  | 8.93E-05 | 1  | 2.90E-04 | 0  | 0.00E+00 |
| chr6:70990<br>715C>T                        | NM_001851.5:<br>c.904G>A       | NP_001842.3:<br>p.Gly302Ser        | COL9A1 | 6  | 5.41E-04 | 2  | 5.80E-04 | 4  | 5.81E-04 |
| chr7:23145<br>649G>A                        | NM_001031710.3:<br>c.4G>A      | NP_001026880.2:<br>p.Ala2Thr       | KLHL7  | 1  | 8.77E-05 | 1  | 2.80E-04 | 0  | 0.00E+00 |
| chr7:12803<br>5018C>T                       | NM_000883.4:<br>c.1475G>A      | NP_000874.2:<br>p.Arg492Gln        | IMPDH1 | 6  | 5.41E-04 | 6  | 1.75E-03 | 0  | 0.00E+00 |
| chr7:12804<br>1130G>A                       | NM_000883.4:<br>c.443C>T       | NP_000874.2:<br>p.Thr148Met        | IMPDH1 | 2  | 1.78E-04 | 1  | 2.90E-04 | 1  | 1.43E-04 |
| chr8:10466<br>978G>A                        | NM_178857.6:<br>c.4630C>T      | NP_849188.4:<br>p.Arg1544Cys       | RP1L1  | 1  | 1.05E-04 | 1  | 3.50E-04 | 0  | 0.00E+00 |
| chr8:10469<br>047G>A                        | NM_178857.6:<br>c.2561C>T      | NP_849188.4:<br>p.Pro854Leu        | RP1L1  | 1  | 1.05E-04 | 1  | 3.50E-04 | 0  | 0.00E+00 |
| chr8:10480<br>383G>C                        | NM_178857.6:<br>c.329C>G       | NP_849188.4:<br>p.Pro110Arg        | RP1L1  | 1  | 8.78E-05 | 0  | 0.00E+00 | 1  | 1.42E-04 |
| chr8:10480<br>420C>T                        | NM_178857.6:<br>c.292G>A       | NP_849188.4:<br>p.Asp98Asn         | RP1L1  | 6  | 5.33E-04 | 3  | 8.60E-04 | 3  | 4.30E-04 |

|                      |                                |                                 |         |    |          |   |          |   |          |
|----------------------|--------------------------------|---------------------------------|---------|----|----------|---|----------|---|----------|
| chr8:43025<br>820C>T | NM_001363227.2:<br>c.726C>T    | NP_001350156.1:<br>p.Ser242%3D  | HGSNAT  | 2  | 1.77E-04 | 1 | 2.90E-04 | 1 | 1.43E-04 |
| chr8:43046<br>725C>T | NM_001363227.2:<br>c.1237C>T   | NP_001350156.1:<br>p.Pro413Ser  | HGSNAT  | 7  | 6.14E-04 | 1 | 2.80E-04 | 6 | 8.50E-04 |
| chr8:55533<br>586A>C | NM_006269.2:<br>c.60A>C        | NP_006260.1:<br>p.Gln20His      | RP1     | 1  | 8.80E-05 | 1 | 2.80E-04 | 0 | 0.00E+00 |
| chr8:55534<br>144G>A | NM_006269.2:<br>c.615+3G>A     | NA                              | RP1     | 13 | 1.14E-03 | 5 | 1.42E-03 | 8 | 1.14E-03 |
| chr8:55538<br>939T>C | NM_006269.2:<br>c.2497T>C      | NP_006260.1:<br>p.Phe833Leu     | RP1     | 2  | 1.80E-04 | 1 | 2.90E-04 | 0 | 0.00E+00 |
| chr8:87638<br>255T>C | NM_019098.4:<br>c.1534A>G      | NP_061971.3:<br>p.Ile512Val     | CNGB3   | 12 | 1.06E-03 | 2 | 5.70E-04 | 9 | 1.28E-03 |
| chr8:97172<br>796C>A | NM_001001557.4:<br>c.125G>T    | NP_001001557.1:<br>p.Gly42Val   | GDF6    | 3  | 2.63E-04 | 2 | 5.70E-04 | 1 | 1.42E-04 |
| chr9:27188<br>87G>T  | NM_133497.4:<br>c.1148G>T      | NP_598004.1:<br>p.Arg383Leu     | KCNV2   | 3  | 2.63E-04 | 1 | 2.80E-04 | 2 | 2.83E-04 |
| chrX:13753<br>441T>G | NA                             | NA                              | TRAPPC2 | 2  | 1.77E-04 | 2 | 5.80E-04 | 0 | 0.00E+00 |
| chrX:18674<br>836C>T | NM_000330.4:<br>c.121G>A       | NP_000321.1:<br>p.Asp41Asn      | RS1     | 2  | 1.75E-04 | 2 | 5.70E-04 | 0 | 0.00E+00 |
| chrX:38178<br>172T>C | NM_000328.3:<br>c.379A>G       | NP_000319.1:<br>p.Arg127Gly     | RPGR    | 1  | 9.02E-05 | 1 | 2.90E-04 | 0 | 0.00E+00 |
| chrX:41333<br>211A>G | NM_022567.2:<br>c.505A>G       | NP_072089.1:<br>p.Asn169Asp     | NYX     | 2  | 1.94E-04 | 2 | 6.30E-04 | 0 | 0.00E+00 |
| chrX:41333<br>709C>T | NM_022567.2:<br>c.1003C>T      | NP_072089.1:<br>p.Arg335Cys     | NYX     | 1  | 8.89E-05 | 1 | 2.90E-04 | 0 | 0.00E+00 |
| chrX:49062<br>162G>A | NM_001256789.3:<br>c.5584C>T   | NP_001243718.1:<br>p.Arg1862Cys | CACNA1F | 2  | 1.76E-04 | 1 | 2.80E-04 | 1 | 1.42E-04 |
| chrX:49067<br>552T>A | NM_001256789.3:<br>c.4261A>T   | NP_001243718.1:<br>p.Ile1421Phe | CACNA1F | 2  | 1.79E-04 | 2 | 5.80E-04 | 0 | 0.00E+00 |
| chrX:49068<br>452G>C | NM_001256789.3:<br>c.4009-3C>G | NA                              | CACNA1F | 2  | 1.76E-04 | 2 | 5.70E-04 | 0 | 0.00E+00 |

**Table S12.** Carrier frequency (in pseudocontrol cases) and frequency in cases with inherited retinal dystrophies for the top 10 genes with higher carrier frequency.

| Gene   | Allele Count | Frequency | Frequency type |
|--------|--------------|-----------|----------------|
| ABCA4  | 252          | 7,14      | Carrier        |
| USH2A  | 89           | 2,52      | Carrier        |
| PDE6A  | 36           | 1,02      | Carrier        |
| CEP290 | 32           | 0,91      | Carrier        |
| ADGRV1 | 27           | 0,76      | Carrier        |
| CNGB3  | 22           | 0,62      | Carrier        |
| EYS    | 22           | 0,62      | Carrier        |
| CRB1   | 20           | 0,57      | Carrier        |
| RP1L1  | 20           | 0,57      | Carrier        |
| NMNAT1 | 19           | 0,54      | Carrier        |
| ABCA4  | 375          | 21,23     | IRD            |
| USH2A  | 264          | 14,95     | IRD            |
| PDE6A  | 36           | 2,04      | IRD            |
| CEP290 | 33           | 1,87      | IRD            |
| ADGRV1 | 36           | 2,04      | IRD            |
| CNGB3  | 63           | 3,57      | IRD            |
| EYS    | 53           | 3,00      | IRD            |
| CRB1   | 49           | 2,77      | IRD            |
| RP1L1  | 30           | 1,70      | IRD            |
| NMNAT1 | 12           | 0,68      | IRD            |

Supplementary Figures

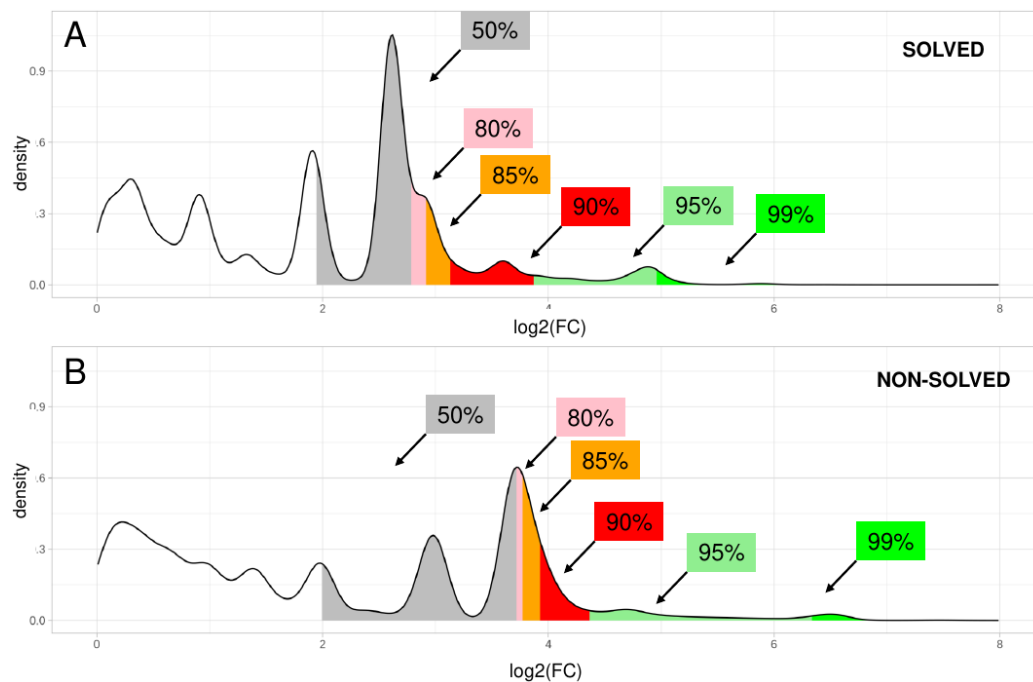

**Figure S1.** Distribution of the values of the fold changes ( $\log_2(\text{FC})$ ) calculated between the allelic frequencies in two IRD subcohorts: (A) solved and (B) non-solved, and the allelic frequencies in the pseudocontrols. Percentiles 50%, 80%, 85%, 90%, 95% and 99% are shown in both groups.

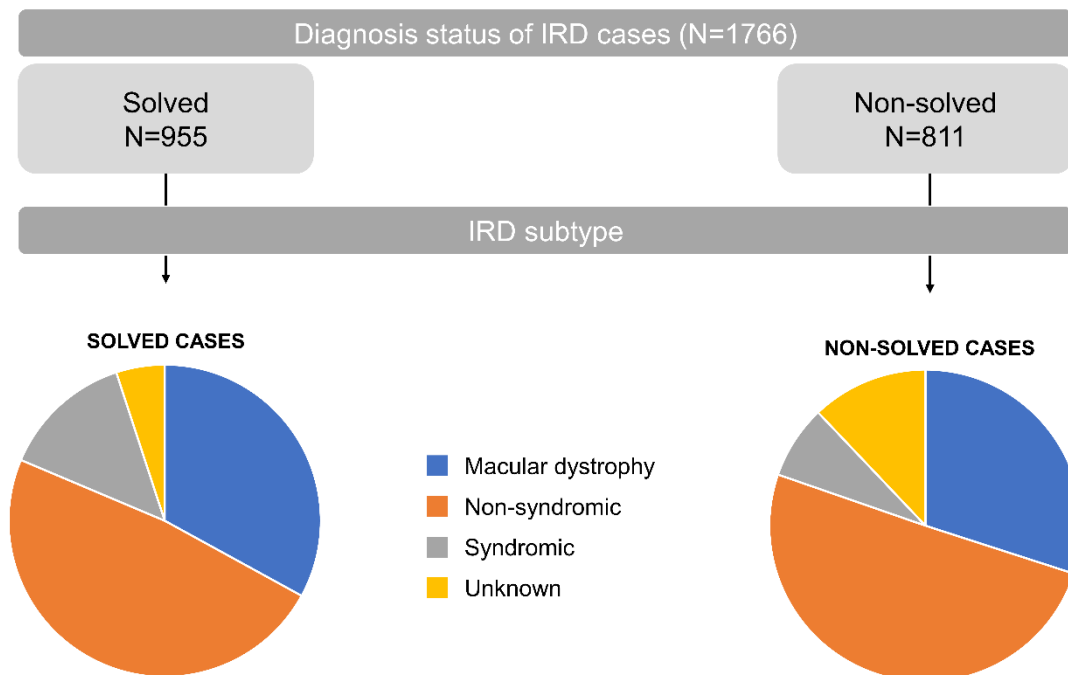

**Figure S2.** Description of the cohort of cases with inherited retinal dystrophies (IRD). Number of cases grouped by diagnostic status (solved and non-solved) and IRD subtype (syndromic, non-syndromic, macular dystrophies and unknown).

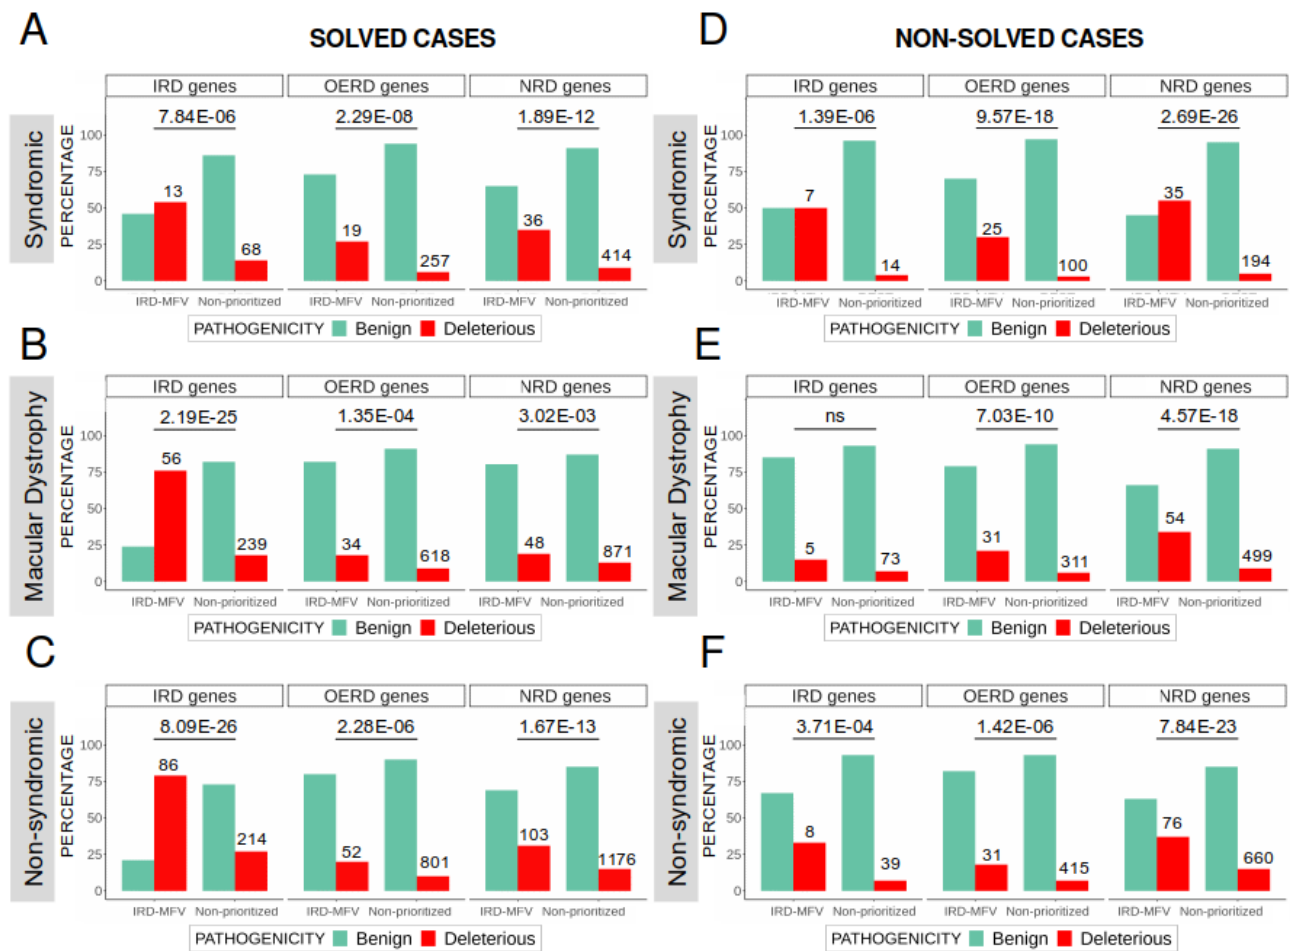

**Figure S3.** Proportion of deleterious and benign variants in both solved (A, B and C) and non-solved cases with inherited retinal dystrophies (D, E and F) for the different IRD subtypes: syndromic, non-syndromic and macular dystrophies. The p-values representing the enrichment of deleterious variants in IRD-MFVs are shown. The genes in which the IRD-MFVs are located are grouped in: inherited retinal dystrophies (RD genes), other eye related diseases (OERD genes) and other non-related diseases (NRD genes). Non-significant p-values are marked as “ns”.

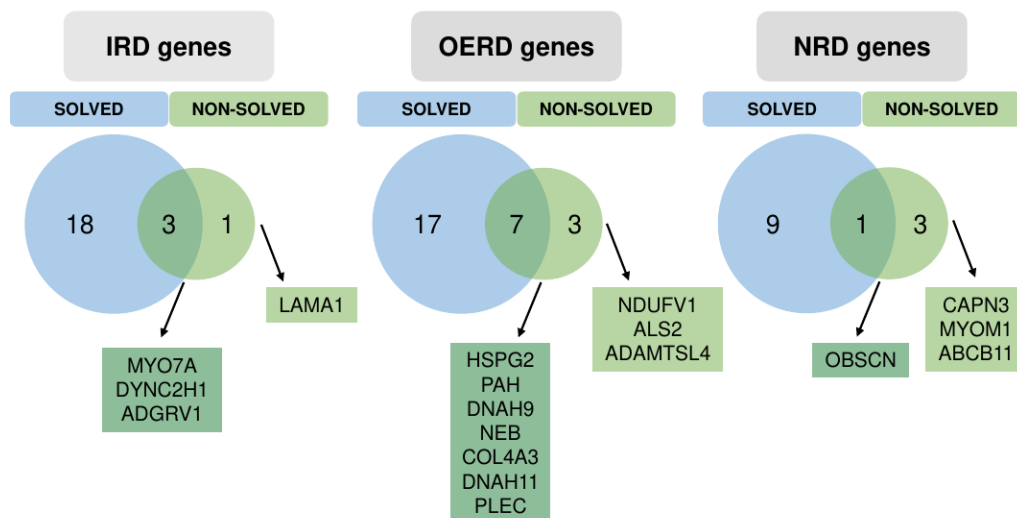

**Figure S4.** Intersection of genes prioritized in solved and non-solved cases with inherited retinal dystrophies. The genes are grouped as involved in: inherited retinal dystrophies (IRD genes), other eye related diseases (OERD genes) and other non-related diseases (NRD genes). We show only the names of the genes prioritized in non-solved IRD cases, in light green those unique to non-solved, and in dark green those in common with IRD solved cases.

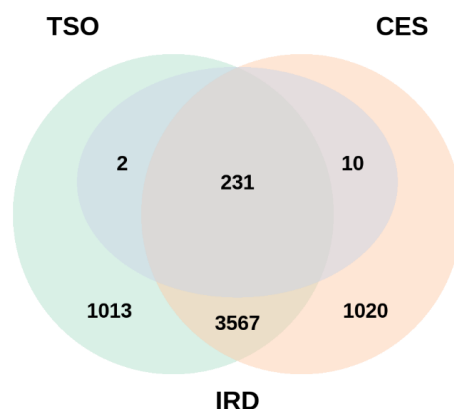

**Figure S5.** Intersection in genes included in the two clinical exomes used in the sequencing of the samples in the cohort: TruSightOne Sequencing Panel kit (TSO, Illumina, San Diego, CA), and Clinical Exome Solution Sequencing Panel kit (CES, Sophia Genetics, Boston, MA). Genes involved in inherited retinal dystrophies (IRD) are also highlighted.



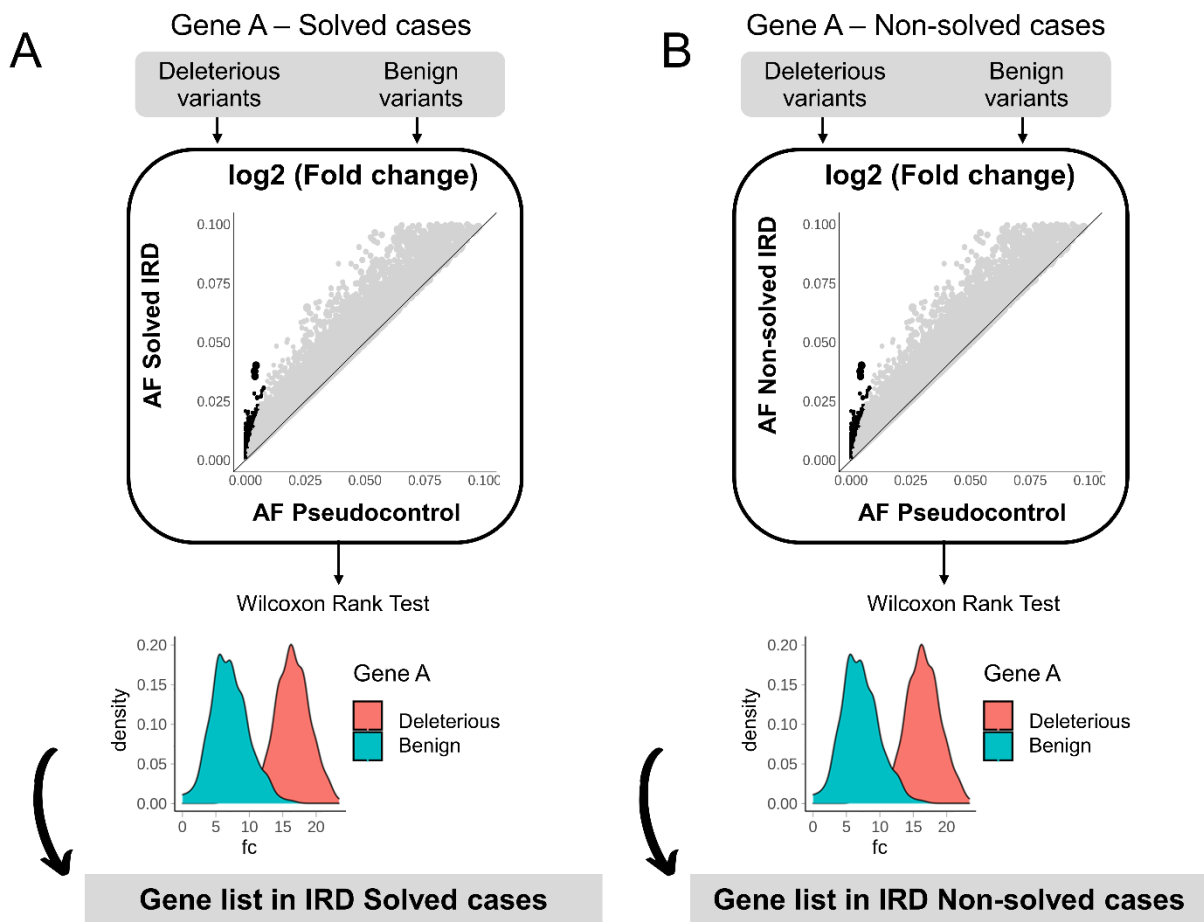

**Figure S6.** Workflow to perform gene prioritization in (A) solved and (B) non-solved cases with inherited retinal dystrophies (IRD).
